# Supplementary material
Source: publisher figshare collection journal article supplement (https://gsapubs.figshare.com/ndownloader/files/25800305)
Supplement: Supplementary file 1 [file 25800305]

## Sheet: Sheet1
Table S3. Trace elements for zircons in igneous rocks from Cebu and Bohol islands
Analysis Spot	Age	Trace element （ppm）																					U/Yb	δEu	δCe
	(Ma)	Sc	Ti	Y	Nb	La	Ce	Pr	Nd	Sm	Eu	Gd	Tb	Dy	Ho	Er	Tm	Yb	Lu	Hf	Ta	U
C9-2-13	109.999	76.6442	7.37834	973.709	0.853224	0.0137534	11.5176	0.0937743	1.64597	3.58888	0.434757	15.9225	5.92664	71.6161	29.1847	147.924	34.9111	402.065	77.1632	10447.3	0.559053	400.881	0.997055	0.148523	36.0138
C9-2-23	107.065	82.4451	9.16961	4410.06	2.67177	0.0294212	23.9264	0.454781	8.94412	14.5378	1.40555	72.2156	27.0922	337.452	134.357	660.708	138.713	1503.37	275.086	9340.23	0.746651	392.287	0.260939	0.108566	15.9206
C9-2-2	111.613	87.7106	13.0971	3765.93	4.77774	0.0125203	39.7559	0.307698	6.4983	13.3448	0.844607	62.8355	21.7861	280.853	114.461	557.373	120.559	1280.26	238.501	8852.96	0.90908	385.355	0.300997	0.0741098	39.4687
C9-2-17	113.585	75.6851	4.71359	3746.63	2.51157	0.00832927	27.8471	0.232148	5.91445	11.9878	0.651005	70.6071	23.1459	296.154	115.672	557.819	118.989	1271.97	229.599	10842.4	0.774712	428.593	0.336953	0.0532031	36.7126
C9-2-21	113.005	112.902	0.451517	2385.55	2.43191	n/a	33.372	0.254049	4.9622	8.63372	0.596896	47.0998	15.3568	201.327	72.4913	355.267	73.6674	800.918	146.859	8383.25	0.740306	224.021	0.279705	0.0720615	n/a
C9-2-3	115.298	90.023	10.6497	3306.11	2.46406	0.0672915	22.452	0.454066	5.88759	12.6009	1.31084	61.01	21.09	266.461	100.762	475.288	103.618	1122.76	206.696	8588.1	0.619971	306.072	0.272608	0.119188	14.4903
C9-2-4	117.172	94.4757	11.224	1885.44	2.53987	n/a	27.4975	0.179912	3.22003	6.56293	0.619898	37.1391	12.3811	153.829	57.6198	274.563	61.6495	661.67	123.188	8351.04	0.747596	215.175	0.3252	0.0955895	n/a
C9-2-18	118.187	80.8882	11.6099	3056.06	1.54656	0.0645321	16.7421	0.344494	5.97299	12.4412	0.901227	58.3922	19.4841	246.325	94.3499	453.042	95.5626	1018.17	184.92	8907.17	0.499348	242.59	0.23826	0.0850343	14.0342
C9-2-22	118.538	74.2856	2.66704	2043.58	1.38184	0.0186697	17.7344	0.0747388	2.25379	6.4816	0.493123	38.6207	13.0623	159.252	61.8945	297.444	64.7166	702.455	127.656	11230.5	0.476469	231.922	0.330159	0.0738355	66.9619
C9-2-5	126.618	78.5901	10.3588	2935.08	2.23121	0.00866042	20.4218	0.3174	4.17207	9.05416	1.02339	56.8805	19.1785	237.758	89.8136	427.533	91.284	1000.78	179.711	9627.65	0.915877	285.824	0.285601	0.105038	19.759
C9-2-10	123.693	109.522	12.1941	2055.55	1.29106	0.0414912	8.20186	0.23947	3.92517	6.97136	1.37008	33.3648	11.4617	148.786	61.8212	299.766	61.1078	625.713	116.965	9429.79	0.748079	124.868	0.199561	0.227219	9.94267
C9-2-11	121.876	83.8475	4.47553	2477.85	8.02068	n/a	53.4631	0.154906	2.29853	8.14501	0.115283	38.744	14.1822	181.717	73.3416	375.483	85.4985	981.169	176.889	12744.1	1.86352	515.369	0.525261	0.0164423	n/a
C9-2-14	123.234	87.9798	7.94842	830.963	1.52405	0.0167151	9.38147	0.0189253	0.519497	2.15521	0.218184	11.6497	4.00994	57.0157	24.0459	127.348	30.5021	361.922	72.553	9693.62	0.529979	130.288	0.35999	0.106302	113.658
C9-2-15	127.74	85.1483	13.4773	1457.13	2.20545	0.0284063	22.1953	0.0696935	1.85478	3.86472	0.406643	24.793	8.70708	109.404	44.399	213.32	47.7012	516.003	96.6007	9213.44	0.624738	245.989	0.476719	0.0961038	84.9864
C9-2-16	120.2	85.5451	16.4674	3481.22	1.38829	0.0651187	17.1822	0.350298	6.03263	11.3787	1.46672	72.4207	24.1372	278.255	109.082	512.475	108.912	1172.14	214.059	8184.34	0.61446	241.228	0.205802	0.118507	14.172
C9-2-7	137.526	154.036	11.8165	1766.45	8.32092	0.0248985	42.6136	0.0845014	1.44113	4.14333	1.95099	26.9677	9.88529	121.012	49.5613	244.175	57.1517	640.73	120.979	9602.89	1.98744	380.099	0.593228	0.42496	140.024
C10-1-1	33.5209	132.624	n/a	1576.46	8.9986	0.0253748	43.0974	0.0885025	1.15872	3.61599	2.28771	25.9955	9.41657	117.095	42.9868	207.211	44.3396	460.744	81.0339	11936.1	1.88171	1523.28	3.30612	0.525446	135.597
C10-1-2	34.2256	115.984	11.198	1782.82	11.8476	0.0181406	73.5074	0.156474	2.1259	7.35233	3.73461	41.8463	13.3731	144.374	49.8187	224.1	45.1003	469.188	81.1651	11151.4	2.15244	2297.5	4.89675	0.511667	139.368
C10-1-3	33.8779	110.899	n/a	1292.37	5.95772	0.0135502	32.978	0.051057	0.932913	2.6601	2.03055	20.0859	7.16085	84.5182	33.0501	167.113	37.1274	402.103	74.7335	10452.7	1.1479	1403.37	3.49008	0.608183	181.245
C10-1-4	34.4402	109.255	n/a	1523.07	8.29573	0.213393	49.3551	0.0906898	1.22397	3.11265	2.20952	26.932	8.56945	104.734	40.5729	191.726	42.3709	466.867	84.0247	11640	1.67142	1820.36	3.8991	0.503238	86.9483
C10-1-5	34.8088	87.4654	19.4287	2170.69	7.67007	0.129605	246.749	1.35684	19.8587	27.7395	12.7444	97.908	23.7494	217.282	63.6176	247.382	44.8114	426.632	68.6941	8708.16	1.2542	1321.6	3.09775	0.668135	54.3763
C10-1-6	34.8345	114.139	12.4846	1504.05	8.84854	0.0278497	45.2581	0.0763571	0.86309	3.05216	2.34298	22.7568	8.26971	106.672	39.4507	191.846	42.3573	456.844	82.1998	11605.3	1.83996	2034.65	4.4537	0.618213	160.542
C10-1-7	34.5242	122.681	2.23043	1585.88	6.12704	0.00733804	45.5385	0.152259	1.60925	5.38751	2.85888	33.2847	10.461	122.552	44.5195	200.654	43.041	457.509	78.9234	10752.6	1.27843	1353.01	2.95734	0.499955	91.0935
C10-1-8	34.3984	115.98	96.74	1333.91	6.4332	1.12001	37.0093	0.652213	4.87581	5.39434	2.48101	25.8947	8.80215	97.5573	36.3017	167.936	36.3639	401.769	74.9907	11277	1.08661	1155.61	2.8763	0.530506	10.4343
C10-1-9	33.468	103.049	n/a	1445.64	7.37195	0.063662	51.6999	0.0146336	1.41053	4.11066	2.50413	28.9002	9.28989	110.164	39.1059	181.02	38.1847	406.142	70.3215	11357.8	1.70762	2224.47	5.47708	0.515516	399.745
C10-1-10	35.1622	113.395	14.5633	1537.28	9.2395	0.173304	66.0996	0.137687	2.73064	6.21643	3.29643	34.7841	10.4003	118.285	41.5542	192.256	39.7674	423.002	74.5713	11193.2	1.45094	1833.15	4.33367	0.541554	99.0617
C10-1-11	34.261	142.183	5.78775	2390.53	10.0616	0.240176	94.2847	0.447086	6.36588	13.2642	8.5568	67.6969	19.0114	202.616	68.4972	295.969	60.8789	612.955	105.333	10357.4	1.42361	1962.36	3.20148	0.70908	53.8711
C10-1-12	34.8384	109.677	0.766924	1188.34	5.5341	0.159579	27.246	0.0455347	1.20831	2.92457	1.6847	19.511	6.4291	80.036	31.3819	153.761	34.4934	392.027	72.2557	11652.2	1.12231	1369.78	3.49409	0.509326	77.2478
C10-1-13	35.2574	140.468	2.12598	2546.13	8.71853	0.0730073	63.1403	0.213359	3.92023	10.6088	5.30253	55.4	18.0739	198.273	67.2005	298.726	59.0287	617.815	106.169	10540.6	1.14923	1916.79	3.10254	0.539488	80.7935
C10-1-14	34.7815	124.253	8.35103	1275.36	6.19579	0.302348	34.744	0.0971778	1.14779	3.14455	1.78083	19.865	6.82042	83.5158	32.6817	165.622	37.4823	437.005	81.1184	11503.4	1.15322	1392.68	3.18688	0.523873	49.3952
C10-1-16	35.8496	122.166	18.7305	1790.9	8.02163	0.0744197	42.9362	0.133424	1.93241	5.05738	3.16411	33.8725	11.3794	134.327	49.3514	231.543	48.0128	507.402	89.5272	11144.9	1.54835	1510.53	2.97698	0.551369	81.6506
C10-1-17	33.7052	118.207	8.96839	1912.98	11.4367	0.0406122	80.0366	0.184665	3.05654	8.46465	4.5763	42.0852	13.6588	151.03	54.0187	240.705	49.4543	528.968	91.1718	11075.9	1.9699	2606.93	4.92833	0.60666	123.656
C10-1-19	34.6769	110.234	n/a	1281.66	6.07025	0.0865811	33.1174	0.0480539	1.2291	3.40856	1.73395	21.6963	7.65282	91.3599	34.3685	171.034	36.211	408.346	75.6395	11097.1	0.940892	1445.81	3.54064	0.467647	124.234
C10-1-20	34.1708	125.987	11.7102	1773.12	9.73173	5.81104	140.429	2.6334	15.4766	13.9021	6.06974	45.7765	12.9469	141.789	48.4561	218.684	45.7572	470.311	81.9631	10848	1.44493	1586.07	3.37238	0.667372	8.78492
C10-1-22	33.1035	109.481	n/a	1560.68	8.63172	0.032963	54.0324	0.0559529	1.23181	5.17722	2.88287	31.8457	10.8779	124.138	43.6013	199.797	42.4815	455.16	77.6502	11525.8	1.67379	1980.31	4.3508	0.526518	242.529
C10-1-23	33.6878	114.064	3.45228	1366.62	6.477	0.0929617	45.6252	0.156609	1.66683	3.68101	2.13615	22.8814	7.77907	92.5006	35.469	176.571	39.4431	436.525	82.011	12046.2	1.3788	1725.6	3.95303	0.544005	73.0618
C10-1-24	33.7918	118.715	11.3603	2334.89	10.5496	1.21121	118.654	0.787412	10.1181	15.9737	6.78711	66.903	19.4271	199.514	67.7076	290.571	59.4955	603.531	105.351	11146.3	1.71651	2211.72	3.66463	0.544319	28.939
C10-1-25	34.6115	113.451	n/a	1480.92	6.93865	0.0617227	46.9106	0.109683	1.29015	4.21719	2.71735	29.0244	9.52382	110.735	41.4084	190.078	41.3469	436.607	79.7789	11659.4	1.4019	1839.43	4.213	0.555101	108.342
C10-1-18	36.3862	126.153	4.78819	1480.35	8.73744	0.0239375	49.8564	0.0625338	1.43948	4.83264	2.437	23.0488	8.47101	101.96	38.1547	187.302	40.8133	460.599	83.4405	12150.6	1.6371	2224.95	4.83056	0.584606	214.592
C10-1-21	36.0754	131.377	n/a	1455.35	6.63763	0.73249	95.4828	0.984191	11.836	15.386	7.84156	60.2854	14.814	132.503	39.7016	161.814	32.5152	340.592	58.2777	11198.2	1.17175	1109.51	3.2576	0.686428	23.1987
C10-1-26	39.9676	382.397	4.45282	1499.92	8.1834	0.00763438	43.6557	0.0888922	1.32673	3.43196	2.38529	24.9003	8.51074	104.35	40.4629	195.192	43.3593	480.16	84.4499	11843.1	1.48464	1410.38	2.93732	0.572779	147.394
C10-1-27	35.6924	395.034	2.73514	1245.47	6.01189	0.0841753	27.766	0.0445709	0.745754	3.0154	1.92698	20.9669	7.379	92.8549	34.7294	166.278	36.7293	404.305	69.5971	13057.7	1.28914	1272.52	3.14741	0.545827	110.075
C10-1-28	106.505	477.621	37.228	2225.35	4.84796	0.0441968	35.7197	0.207834	3.23796	5.53677	2.74123	39.6434	13.3377	169.523	63.9743	307.921	62.9894	697.851	125.116	9050.38	1.42064	355.756	0.509789	0.412593	49.1662
C10-1-29	33.1361	387.213	1.599	1321.38	8.27233	0.0377775	43.4697	0.0492029	0.975691	3.38395	2.09613	22.7864	7.74639	95.3448	35.7496	172.604	38.6578	434.021	75.8581	13178.2	1.92391	2230.3	5.13869	0.543461	209.734
C10-1-30	33.0381	389.519	3.43817	1294.23	6.56341	0.151583	32.9787	0.0740128	1.18745	3.38186	2.18441	22.7569	7.69607	93.7016	35.2102	169.479	37.9479	426.53	74.0021	12830.9	1.34025	1547.22	3.62747	0.56702	75.9679
C10-1-31	35.1144	394.711	4.45706	1478.36	8.95581	0.0946956	38.9182	0.0541685	1.0544	3.56632	2.39424	25.6653	8.72522	106.714	40.2033	195.339	44.2919	490.436	85.9723	12759.8	1.77909	1900.21	3.87453	0.557079	131.151
C10-1-32	34.8213	388.962	3.98508	1370.51	8.04307	0.234006	39.2297	0.11178	1.2857	3.54059	2.09698	22.5508	7.9551	96.2942	37.4785	183.718	40.92	464.356	81.3085	12788.8	1.6355	1708.3	3.67887	0.544184	59.2429
C10-1-33	34.4363	410.165	3.70217	1414.97	8.31975	0.112279	32.7948	0.0621679	0.949154	2.86081	1.78529	21.5557	7.3854	96.3948	37.6404	186.67	42.6896	481.49	85.2182	13252.2	1.60502	1400.8	2.9093	0.498105	94.9985
C10-1-35	33.8698	404.751	3.92402	1509.61	6.95218	0.0274541	51.3256	0.173314	2.48445	5.32114	2.97922	28.8946	9.24122	108.693	39.9646	191.058	41.7168	462.23	81.0809	12653.3	1.29825	1606.8	3.4762	0.58575	86.4503
C10-1-36	34.311	406.079	2.27221	1629.68	9.38315	0.033016	42.9063	0.0603696	1.07479	3.23018	2.07623	23.1423	8.61664	110.666	43.4144	213.44	48.757	547.095	95.2534	12655.1	1.62636	1665.49	3.04424	0.535378	180.976
C10-1-37	34.1493	395.128	2.79419	1412.82	8.71041	0.0862309	46.1737	0.0647226	1.09814	3.69059	2.15993	23.4628	8.13325	97.6345	37.0869	182.203	40.7539	470.153	82.1917	12811.6	1.83057	2023.78	4.30451	0.538559	144.378
C10-1-38	34.8127	382.009	3.44546	937.156	4.76014	0.188564	24.5139	0.0730665	0.980603	1.96705	1.26188	13.5404	4.87431	62.2677	24.624	123.256	28.507	326.573	58.6915	13058.5	1.08382	932.999	2.85694	0.552572	51.1973
C10-1-39	34.0209	395.751	2.70869	1392.77	8.10701	0.0112236	46.888	0.0477929	1.05527	3.95431	2.13219	23.3135	7.8167	94.2034	36.7744	180.228	41.795	481.199	84.9914	12883.9	1.69632	2066.69	4.29487	0.527836	278.375
C10-1-41	35.2599	392.533	4.0096	1050.49	4.47881	0.131223	20.5529	0.0692015	0.807634	2.21429	1.39291	14.9725	5.70358	71.3705	28.1913	141.388	32.2136	374.516	66.8185	12728.8	0.879337	1022.85	2.73113	0.54999	52.3869
C10-1-42	31.9515	390.781	3.71881	1544.21	8.88057	0.0090913	46.2772	0.0464174	1.08046	4.12328	2.33381	26.817	9.39809	112.893	42.2103	202.574	44.3571	488.236	83.8052	12564.5	1.83418	1982.5	4.06054	0.511136	286.989
C10-1-43	33.6143	398.231	2.86349	1532	9.39699	0.0246352	41.094	0.0495773	1.2591	4.02038	2.66741	30.3639	10.2112	122.967	44.1586	203.747	43.4323	460.476	77.5523	13164.9	2.0429	1776.56	3.8581	0.528518	214.592
C10-1-45	33.1605	392.423	3.45678	1661.6	9.75888	1.09828	61.7679	0.456178	3.18558	5.86086	3.17476	33.2799	10.7027	124.675	45.4325	213.488	45.7741	509.581	87.5552	12977.9	1.87871	2297.54	4.50869	0.546683	21.3922
C10-1-46	32.2748	423.46	4.91759	2074.42	10.3005	0.0916227	66.4077	0.15333	2.69115	6.53732	3.84937	39.3688	13.1196	153.581	55.8635	260.277	55.5182	622.876	107.228	12601.3	1.68852	2469.37	3.96446	0.566518	108.477
C10-1-47	32.5319	388.071	3.39848	1576.39	9.00038	0.0672726	54.2395	0.0956839	1.84784	5.4188	3.24584	34.0853	11.0422	124.186	43.908	202.147	43.0218	459.422	78.2828	11797.7	1.69304	2166	4.71462	0.556062	137.294
C10-1-48	36.0789	389.746	4.96428	1288.33	6.17408	0.391638	40.8175	0.154736	1.43022	2.61567	1.57946	18.5262	6.23242	81.1144	32.6771	166.967	39.2179	471.254	88.0132	12429.9	1.04445	1514.51	3.21378	0.507835	40.6521
C10-1-49	34.8347	388.357	3.97308	1237.02	5.67628	0.244511	33.4617	0.120818	1.48622	2.76648	1.71094	20.0442	6.94402	86.2319	33.2807	165.535	37.1024	418.79	75.8803	12490.2	1.10986	1359.44	3.24611	0.510274	47.4728
C15-1-3	91.3317	158.293	6.30532	940.894	1.69641	0.100035	38.9697	0.149614	2.61959	5.70437	2.39781	22.1723	6.71294	71.7337	26.4916	120.798	25.7204	299.552	60.126	11015	0.401629	418.746	1.39791	0.569531	63.7724
C15-1-8	88.4728	308.589	21.9142	1249.14	4.75016	0.811883	69.9451	0.669466	6.6814	10.5948	3.05831	46.369	11.4636	115.391	34.733	149.58	29.353	316.358	59.8907	11654.1	0.905247	1320.18	4.17307	0.357625	21.8262
C15-1-9	95.5212	288.911	0.116823	1229.14	6.72075	0.145897	69.3804	0.390863	4.71978	9.5259	2.58289	40.67	10.5877	108.145	34.9196	151.949	29.7375	327.909	58.0854	11975.5	1.04355	1273.69	3.88429	0.342337	47.9357
C15-1-16	103.641	135.009	10.9158	1263.33	2.9181	0.123033	44.9529	0.24525	5.60743	12.0399	6.43669	50.0125	12.927	125.067	37.0655	149.491	27.5093	280.144	52.1261	9999.58	0.426626	260.554	0.930071	0.689167	47.3778
C15-1-19	106.305	153.884	6.53891	795.892	1.84245	0.230165	40.9722	0.134076	1.5494	3.72502	1.49026	16.4992	5.08774	60.5334	21.8172	100.696	22.5491	260.582	51.3401	10777.3	0.359763	343.926	1.31984	0.49112	56.2003
C15-1-20	123.822	199.74	9.44821	1016.97	2.56805	0.501501	37.699	0.675391	7.81074	10.5459	3.07636	32.6322	8.71632	90.017	29.7133	131.303	26.3389	294.69	56.8034	11791.1	0.538751	665.826	2.25941	0.465837	13.3543
C15-1-13	160.49	222.951	n/a	1233.34	9.3752	0.0976482	27.2525	0.103195	1.63629	3.93287	0.908703	21.8365	7.80765	92.2773	36.0247	168.246	34.9993	395.444	75.0369	12462.3	2.7265	901.381	2.27942	0.237445	59.4416
C15-1-2	246.575	227.449	32.2005	1725.41	0.491362	0.0251777	1.1869	0.177551	2.80244	6.15525	0.289067	34.7276	11.2455	143.92	52.7845	243.022	47.2616	479.209	82.8053	10884.8	0.393955	169.981	0.354711	0.0476425	1.96374
C15-1-7	249.121	172.733	12.6568	1877.9	0.732255	0.0448947	0.797024	0.0449495	0.532708	2.76354	0.0859771	20.9755	9.44759	136.45	56.3284	272.855	56.5382	583.208	102.384	12216.3	0.479311	280.596	0.481125	0.0246787	3.93107
C15-1-10	254.69	158.185	10.5617	3094.45	0.823748	n/a	2.63506	0.068455	1.9677	7.09046	0.172073	48.8693	17.9191	250.908	92.8596	426.674	83.302	826.084	134.923	11494.9	0.549888	503.218	0.609161	0.0208817	n/a
C15-1-17	253.459	85.1826	4.34894	2626.24	9.08018	4.96441	31.8654	2.45227	12.5743	10.2282	0.492673	40.0864	14.2524	187.61	74.0699	367.266	79.0893	849.003	149.767	10938.6	4.80533	2739.07	3.22622	0.0648627	2.22701
C15-1-21	235.428	211.15	27.4501	2419.58	1.10872	0.260167	1.90283	0.221858	0.796225	7.9631	0.657718	29.4553	14.1662	179.533	70.322	309.605	69.2032	693.607	118.473	11148	0.686257	315.025	0.454183	0.116081	1.81131
C15-1-4	412.503	140.47	7.70303	1702.81	1.21255	0.00833594	4.72975	0.0621043	1.02554	2.79735	0.168244	21.7032	8.60199	125.767	50.1923	238.87	49.8492	519.911	91.2642	11548.3	1.11233	516.396	0.99324	0.0468262	22.4367
C15-1-22	434.713	145.159	52.629	584.334	1.7121	0.312536	6.39548	0.36791	3.13883	3.86994	1.12843	11.104	4.16646	49.0924	16.5918	77.0846	15.4425	155.633	26.202	10140.1	0.384376	224.005	1.43932	0.490516	4.02589
C15-1-5	787.998	82.8228	8.13129	750.45	2.15156	0.0423934	6.92324	0.135999	1.20057	2.62749	0.321016	16.9199	5.79552	66.4717	23.5982	102.903	20.6826	204.655	34.1283	9302.01	0.905946	133.462	0.652131	0.111242	14.0489
C15-1-6	773.892	78.9421	7.51668	633.219	2.34803	0.0084685	5.7742	0.0678902	1.38278	2.26405	0.249501	13.0756	4.74229	54.4499	19.0483	86.7778	17.1504	170.855	30.0058	9594.94	0.857709	123.9	0.725175	0.109702	25.1477
C15-1-11	2005.25	152.735	22.8455	1550.27	0.886823	0.133542	2.13191	0.175522	2.72696	5.64477	0.127716	31.1107	11.4396	131.17	45.9336	201.964	39.1048	388.118	62.0708	11523	0.668913	141.077	0.363489	0.0233901	2.88959
C15-1-15	1821.3	121.854	15.3546	793.928	0.893522	0.0425062	7.70474	0.101713	0.65529	1.97211	0.200906	13.357	4.71204	61.0293	23.9551	114.597	23.2884	256.594	44.0398	11321.5	0.636626	188.237	0.733599	0.0889464	20.1428
C17-1-4	97.9047	108.537	10.6459	751.487	2.53249	0.127687	34.0229	0.0636363	1.55031	2.31669	1.08604	13.6498	4.2274	51.1785	19.5865	99.8227	22.8655	278.057	55.7121	11068.4	0.621302	394.462	1.41863	0.459143	91.9944
C17-1-5	88.1208	118.516	44.2809	1813.46	11.0339	0.117737	178.461	0.268372	5.36971	13.2479	3.08458	52.7368	14.7819	150.361	50.1778	222.278	46.3741	502.922	82.124	9822.47	1.94983	1155.21	2.29699	0.309908	175.572
C17-1-2	132.816	141.93	8.68229	2415.78	7.05998	2.8519	148.276	1.34909	12.0157	13.4572	1.76429	62.6306	19.6125	224.638	77.4333	327.215	60.1735	577.747	96.7441	7642.37	1.85511	316.06	0.547057	0.15491	18.4706
C17-1-1	243.45	93.2882	21.3386	757.862	0.545321	0.0949077	1.62006	0.0494747	1.06632	1.98101	0.0667598	14.215	4.76385	57.2367	21.9299	103.722	20.8968	214.132	36.8456	10265.3	0.432192	140.083	0.654192	0.0280328	5.74693
C17-1-7	235.196	166.403	9.72531	2508.99	1.02398	0.0646145	1.95488	0.188908	1.77932	5.62813	0.343567	38.5273	14.7916	191.425	75.4062	349.839	69.2593	702.476	116.254	11821.8	0.458187	364.347	0.518661	0.0528263	2.82534
C17-1-8	231.601	143.085	16.4845	1926.51	1.24696	n/a	1.90375	n/a	3.34503	5.69124	0.313559	39.2232	11.6226	155.709	59.7366	273.376	52.734	531.911	91.5551	11413.5	0.603736	306.285	0.575819	0.0474092	n/a
C17-1-9	248.438	191.635	39.0173	2264.05	0.445208	0.0466991	1.44909	0.131176	2.14706	5.04465	0.305811	38.7184	14.5242	177.479	67.6954	311.3	62.4339	627.982	108.459	11185.1	0.492246	259.945	0.413936	0.0476334	3.00132
C17-1-10	234.756	167.753	10.0059	2000.66	0.677866	n/a	0.993643	0.0346768	1.20007	3.15816	0.0857363	28.5163	10.5317	150.936	57.3377	287.114	57.9265	600.139	102.387	11751.1	0.520034	250.818	0.417933	0.0185464	n/a
C17-1-3	257.122	105.221	6.03558	2113.41	3.65868	0.922471	13.7324	0.658817	5.98677	8.13176	0.488881	41.4402	14.4466	174.5	63.5461	294.221	60.1098	622.462	104.332	10441.7	2.46854	1104.2	1.77393	0.0661604	4.14484
C17-1-6	906.658	114.576	17.71	470.974	0.589427	0.0163988	3.19427	0.0981756	1.04093	1.96151	0.381534	11.7802	3.30846	40.9442	15.023	66.0623	12.9555	135.245	23.9991	7631.41	0.251957	63.6456	0.470595	0.18756	9.46727
C19-1-1	37.3469	195.84	9.61125	4525.19	0.822849	n/a	14.4993	0.195394	5.01459	11.5535	2.69286	73.4029	25.8051	341.118	133.025	647.408	133.208	1471.62	254.186	9365.18	0.207906	225.966	0.153549	0.214598	n/a
C19-1-7	38.5862	200.938	n/a	3608.28	1.1014	0.113076	19.4214	0.324897	4.02327	7.5833	2.62436	48.3164	16.1188	229.319	94.8137	512.868	127.184	1617.96	329.589	10810.1	0.341728	663.133	0.409858	0.317883	16.2861
C19-1-8	41.353	394.161	24.0166	10044.2	2.72166	0.0171528	69.3239	0.719845	16.0744	34.6238	8.43275	189.636	63.5541	796.934	300.025	1400.74	286.362	3031.04	538.979	8623.22	0.670575	724.743	0.239107	0.253053	29.6154
C19-1-11	42.3263	219.557	n/a	2911.31	1.22404	0.376554	18.4897	0.305084	2.82209	3.85927	1.016	35.2481	12.9714	186.255	80.614	425.11	95.4291	1095.75	211.151	9951.04	0.576869	349.175	0.318664	0.178067	12.5877
C19-1-12	39.9791	130.902	201.567	3870.81	0.878295	n/a	12.8228	0.139971	5.49213	9.23226	2.19207	67.1478	22.7335	295.803	113.291	550.451	112.369	1226.79	222.35	9842.7	0.285277	184.182	0.150133	0.195271	n/a
C19-1-13	39.0868	212.005	68.75	4070.29	0.910458	0.0319284	14.8257	0.260579	4.61485	8.78473	2.54343	64.1167	22.8967	308.035	122.007	581.652	118.174	1283.71	234.038	9403.53	0.296153	224.967	0.175247	0.237412	16.8366
C19-1-14	41.8252	196.116	17.5622	2227.48	1.04461	0.110238	12.1798	0.0427817	1.83037	2.47386	0.924879	22.6845	8.99088	136.238	59.7742	324.049	78.1577	921.551	185.138	9870.65	0.340113	233.219	0.253073	0.252002	43.4786
C19-1-17	110.399	244.382	46.8541	2312.23	1.0039	n/a	10.0914	0.0770788	1.01306	3.66582	0.951134	27.1397	10.8186	149.726	64.802	346.441	76.4808	877.303	162.808	9501.49	0.334596	169.527	0.193237	0.210207	n/a
C19-1-16	846.479	263.125	31.93	4510.17	7.45592	0.063275	11.4302	0.0771827	1.27989	4.07894	0.412638	43.1757	21.1376	322.116	134.203	665.829	143.708	1564.38	267.097	13472.3	4.50236	1438.09	0.919273	0.0600983	34.6049
C19-1-5	2428.7	166.73	67.6056	388.547	0.708219	0.00592394	6.553	n/a	0.189514	1.16923	0.378581	6.1099	2.31147	29.7414	10.1163	51.9514	11.4058	135.296	24.8491	11392.9	1.0958	596.312	4.40747	0.349295	n/a
C19-5-17	31.906	111.706	2.9141	1385.67	5.31015	0.182125	38.0709	0.0764458	1.73794	3.66893	2.23806	23.7769	8.5687	102.543	37.6978	177.906	38.1591	425.704	75.1002	11719.6	1.10997	1448.91	3.40357	0.5525	79.0862
C19-5-21	35.2441	100.37	0.9452	1339.17	6.51739	0.013908	35.4498	0.0318843	1.18015	4.86826	2.44955	26.4046	8.94085	102.326	35.3392	163.001	34.4206	376.061	65.9756	12201.9	1.24898	1218.12	3.23916	0.526906	293.804
C19-5-3	113.661	94.0575	15.9925	1986.01	2.30201	0.0242087	20.1118	0.116973	2.74261	5.78979	0.436242	32.4464	11.5141	147.598	58.5377	296.187	66.6556	748.03	140.472	8513.35	0.529893	171.077	0.228703	0.0768544	49.2896
C19-5-5	113.879	141.853	16.049	3193.27	5.72771	0.0877556	41.0881	0.14935	3.30465	6.50139	0.783748	42.948	15.3002	209.2	90.1449	485.858	111.759	1258.72	235.455	9041.34	0.947609	386.36	0.306946	0.107465	69.1289
C19-5-11	112.905	78.702	9.75061	1040	1.20242	n/a	12.7101	0.0732677	1.31179	2.77644	0.244267	16.4302	6.08368	77.0404	30.0487	154.515	35.0498	403.974	74.1875	9812.98	0.319723	120.333	0.297872	0.0858621	n/a
C19-5-12	106.182	79.2053	12.6631	1040.35	0.481412	n/a	9.23964	0.0482005	0.778741	2.62261	0.569938	17.4305	6.19475	80.7528	31.7669	157.268	35.5464	398.633	72.5048	10442	0.192929	77.8534	0.195301	0.19275	n/a
C19-5-22	109.165	82.9321	9.09952	5661.41	4.40383	0.0857186	41.1429	0.619531	11.3991	20.2192	1.38885	98.7089	34.0871	433.121	172.024	816.999	174.851	1876.34	339.299	9731.95	1.11702	562.317	0.299689	0.0781916	19.534
C19-5-1	118.841	88.4641	7.12778	1931.26	5.18974	0.351026	33.9982	0.204818	2.1787	5.34548	0.215823	27.3461	10.6723	136.231	56.4087	293.533	66.7813	767.994	143.891	11842.9	1.40432	346.382	0.451022	0.0442962	30.5477
C19-5-6	118.232	75.3499	0.772326	1815.9	0.714354	n/a	13.4234	0.0912794	2.50348	6.30278	0.791903	38.3131	12.3018	148.166	55.4829	265.066	56.4465	604.982	108.285	9777.03	0.25674	120.261	0.198785	0.119961	n/a
C19-5-8	121.68	67.8708	1.74098	655.778	1.18255	n/a	13.5289	0.0192432	0.433798	2.45919	0.162919	9.39377	3.53447	44.7991	18.3638	100.215	24.9253	306.062	58.7182	9633.45	1.4376	1057.61	3.45553	0.0909265	n/a
C19-5-13	117.626	92.8086	5.28526	1672.29	4.16065	0.0165548	20.7274	0.0882861	1.40504	4.09912	0.204991	22.0804	8.53197	111.444	48.2236	260.092	60.9259	732.946	143.152	10607.6	1.26327	259.362	0.353862	0.0526574	67.7922
C19-5-14	121.3	85.4162	26.4792	1022.83	1.77961	n/a	11.0049	0.0235916	0.447019	2.77303	0.225477	13.8884	5.25256	71.4929	29.8877	155.211	34.8602	412.469	81.8436	10262.3	0.595935	111.51	0.270349	0.0907158	n/a
C19-5-16	120.5	90.6463	9.55696	1677.48	3.08781	n/a	25.6353	0.0885549	1.71981	3.55583	0.286915	23.655	9.67854	119.61	48.6572	246.224	55.9331	634.667	117.71	10572.1	0.735604	264.809	0.41724	0.0715115	n/a
C19-5-18	120.327	88.3945	14.3456	1443.5	1.47374	n/a	10.625	0.0321212	1.12959	2.53444	0.19559	19.5826	7.65018	101.097	40.99	213.521	48.8202	564.969	107.048	10384.8	0.500571	156.878	0.277675	0.0602954	n/a
C19-5-15	235.79	297.86	1268.07	4658.17	5.90796	0.0331564	3.30406	0.357751	7.59091	16.5254	0.409854	82.2182	30.5352	386.017	144.927	646.776	130.502	1305.5	217.484	12081.1	1.49508	870.656	0.666913	0.0278153	2.76457
C19-5-24	267.576	148.72	11.5878	667.205	0.406914	0.0166483	2.16511	0.084397	1.74885	2.82569	0.564199	15.9978	5.25858	57.0015	21.2245	91.7965	16.8992	180.451	30.3561	8605.37	0.259307	96.3971	0.534202	0.201992	7.38083
C19-5-25	250.127	118.686	1.81968	557.296	0.4335	n/a	2.98159	0.0373977	0.176236	1.85802	0.507879	9.10642	3.56747	45.3095	17.1083	78.2749	15.6612	157.197	27.7904	10131.7	0.2492	168.836	1.07404	0.3102	n/a
C19-8-3	39.3341	202.139	25.5195	2346.06	0.556355	n/a	13.2735	0.0599307	1.57518	2.61792	0.802461	30.7754	11.6704	161.651	67.8805	341.675	73.6922	816.303	155.607	8991.55	0.30833	259.145	0.317462	0.165825	n/a
C19-8-5	35.4735	114.08	47.3336	1588.01	5.61264	0.665835	55.1181	0.239032	2.80125	5.03728	3.12843	24.1205	8.42984	102.572	38.5238	193.678	44.3027	502.116	88.3355	10988.4	1.40687	1700.81	3.38727	0.717753	33.8227
C19-8-6	38.79	258.198	49.9847	2733.43	0.721945	n/a	11.1377	0.0282367	0.770985	3.16137	0.708179	28.8439	11.3946	169.537	79.1339	408.027	84.8401	1007.75	198.239	9133.09	0.28726	191.931	0.190456	0.151656	n/a
C19-8-7	37.4266	182.649	56.559	3968.52	1.06089	0.186764	14.4571	0.0731435	4.34292	9.13453	1.86744	63.1945	22.8916	290.92	118.901	569.129	120.519	1306.93	243.471	9480.59	0.200685	238.301	0.182337	0.175357	30.3252
C19-8-11	34.0376	194.072	26.082	2942.63	13.8554	0.0326484	76.4909	0.44571	7.24828	16.0869	8.72536	77.4196	22.0733	235.385	85.4979	346.904	66.7673	693.132	115.023	11313.5	1.78563	2280.3	3.28985	0.624375	51.7596
C19-8-14	35.2976	98.9956	28.1692	1265.75	7.20515	0.20874	35.2512	0.112091	1.28333	3.28517	2.12637	24.1032	7.69159	91.8561	34.0653	166.296	35.7569	388.005	67.241	11331.9	1.29743	1457.43	3.75623	0.528409	55.9044
C19-8-20	35.9339	106.821	74.2297	1161.77	3.69353	0.181949	28.0679	0.130034	1.53173	3.03251	1.10902	16.8638	5.88292	73.7707	30.4055	151.458	32.6933	378.5	71.0525	11304.8	0.875505	1140.9	3.01428	0.375355	42.9325
C19-8-21	36.2146	114.825	33.2725	2372.29	7.46712	0.200875	98.5259	1.02225	14.9941	27.2274	14.0153	84.7771	22.3788	211.953	69.5015	266.642	51.5735	520.131	83.9916	9269.73	1.25905	1073.49	2.06388	0.818436	27.7375
C19-8-4	114.516	377.365	114.724	10034.2	35.998	3.79382	90.2509	3.15811	23.1913	33.1207	3.10353	179.663	66.0791	818.174	298.192	1342.14	266.824	2707.97	455.35	10386.8	9.31014	2110.49	0.779363	0.0981146	5.98847
C19-8-13	114.621	192.328	8.23493	3653.46	43.4372	16.2038	77.5114	2.66282	11.0985	10.115	1.08634	58.56	21.9251	289.78	108.695	501.304	103.103	1058.45	177.446	13233.1	13.1018	2660.33	2.51341	0.106701	2.62764
C19-8-15	113.185	180.963	11.9885	1489.91	2.56937	0.0399988	6.96973	0.0457154	0.573398	1.8182	0.434901	16.6813	7.36119	106.079	43.2096	219.744	46.8199	532.031	100.713	9593.5	0.811034	231.369	0.434879	0.161154	35.0422
C19-8-16	112.047	158.095	131.967	6996.23	75.8787	0.635158	70.9326	1.16664	13.6225	32.9389	4.10185	165.892	52.343	595.707	208.598	872.752	165.536	1599.64	255.169	9706.06	13.0796	2399.76	1.50019	0.138324	15.4946
C19-8-17	110.71	179.503	77.6656	3985.03	47.5411	0.154594	57.9762	0.257722	4.70282	10.9651	1.38206	70.5963	26.0686	323.084	120.791	538.129	105.558	1099.4	182.151	10491.5	15.1176	2017.47	1.83506	0.114781	56.3019
C19-8-2	126.052	179.791	4.16833	1987.62	6.08207	0.341076	16.2399	0.125114	1.32595	3.01266	0.352273	24.381	9.98299	141.092	59.2104	298.974	63.4509	692.721	126.469	11372.9	2.36984	386.528	0.557985	0.0878123	19.2558
C19-8-12	131.187	90.7588	21.6683	3548.68	9.13037	n/a	59.2291	0.507694	6.93891	13.9619	2.6927	65.9268	20.6363	252.946	99.3749	477.278	106.67	1186.73	216.875	8155.29	3.44426	1418.66	1.19543	0.225332	n/a
C20-1	107.497	333.518	94.1042	20227.8	32.3408	0.199177	672.108	1.35159	24.055	57.7269	8.80213	329.806	113.055	1434.27	550.979	2629.46	544.369	5984.41	1030.95	12602.7	8.33759	3114.92	0.520506	0.153124	145.771
C20-6	242.114	145.24	11.5001	1735.26	1.04053	1.41102	5.64859	0.592567	4.21409	4.81958	0.165647	30.2952	10.3943	130.438	50.1953	233.357	46.6616	489.555	82.6194	10926.7	0.561419	301.435	0.615733	0.0319242	1.51416
C20-9	428.635	117.25	3.19418	909.36	1.86512	0.0989033	17.2235	0.0212192	1.25306	1.84043	0.524869	11.8494	4.66936	60.9665	24.3735	127.91	28.8036	349.329	64.2509	10141.1	1.31291	652.734	1.86854	0.259705	87.8543
C20-10	434.204	237.371	30.4667	1983.88	5.17836	2.66696	106.171	4.04788	33.0719	31.8919	28.1254	80.7822	21.4091	196.753	56.1977	238.474	47.5236	529.6	91.4949	10543.3	1.27078	1109.22	2.09445	1.61225	6.44172
C20-7	967.816	70.0579	7.51718	864.118	4.65463	0.111704	11.5434	0.0793256	0.884364	1.38788	0.196681	9.42542	3.7958	57.8093	23.6096	127.88	29.3355	346.712	60.7234	14831.6	4.4354	982.09	2.83258	0.123453	28.8774
C20-2	1295.37	223.5	3.44745	2086.87	1.5966	0.0850213	2.55215	0.0574565	1.25708	4.24549	0.184966	31.8897	12.5813	167.043	60.0484	266.394	53.1965	559.857	92.5616	12930.8	1.12499	510.627	0.912068	0.0348667	8.65592
C20-3	1342.59	198.316	7.69829	1438.41	1.2353	0.00681523	3.80236	0.0473359	1.20631	3.35483	0.130128	23.9477	9.40298	114.021	40.5851	184.357	37.3773	413.771	71.5671	12875.5	2.49915	423.391	1.02325	0.0324076	23.5775
C21-3	122.744	152.389	18.939	3968.87	2.9023	n/a	110.856	0.477011	17.4148	46.6032	18.8541	172.211	39.156	368.541	114.203	475.686	88.2507	969.54	164.948	7104.61	0.667734	397.293	0.409775	0.569001	n/a
C21-10	121.17	111.638	10.3201	785.02	0.821164	0.068123	14.5049	0.258806	3.26033	5.88396	3.1418	22.7967	6.50617	68.227	22.507	100.337	19.6011	224.504	42.7318	5443.17	0.362218	102.526	0.456677	0.725201	15.739
C21-7	257.949	119.746	n/a	1277.3	1.01353	0.00452964	1.77008	0.108091	0.925052	3.85835	0.173949	19.5784	7.00493	94.7391	37.3131	176.389	34.932	359.084	61.9894	10653.5	0.539144	226.856	0.631763	0.0497821	5
C21-9	244.862	159.523	19.8861	2017.55	0.617116	0.024137	1.02931	0.0769636	1.3183	4.09225	0.140328	26.9425	10.9375	148.723	60.1585	283.132	57.4868	590.331	100.369	11382.3	0.520829	297.264	0.503555	0.0306543	3.68839
C21-12	252.746	167.208	15.3232	2269.58	0.41214	0.0246908	0.752805	0.0739479	0.891851	3.43626	0.0887327	28.1372	12.0502	162.699	66.7418	326.483	66.063	668.676	115.198	11526.5	0.491767	312.412	0.46721	0.0191978	2.78745
C21-13	238.905	179.614	14.298	2848.44	0.833273	0.145761	1.82869	0.148285	1.88798	5.59993	0.294508	39.4639	16.6292	214.922	84.3492	401.572	79.1689	789.37	131.688	11146.6	0.57608	366.704	0.464552	0.0444168	2.74649
C21-15	247.117	151.053	5703.56	2028.94	12.4306	0.676459	2.20009	0.210722	2.0728	3.34843	0.0414939	26.486	10.9164	148.214	60.4086	288.393	58.1712	608.773	104.46	11168.9	1.31001	330.572	0.543014	0.00949006	1.41745
C21-21	248.663	150.763	6.59413	2034.1	0.75306	0.0652807	1.58569	0.173488	1.41973	3.90231	0.229908	28.707	10.8675	148.417	59.9801	286.089	59.825	604.152	105.746	11923.2	0.547715	410.979	0.680257	0.0479899	2.4657
C21-1	260.146	143.234	18.356	1622.3	1.0224	n/a	1.59107	0.0246941	1.23964	3.57233	0.0727335	26.3422	9.55876	119.939	48.1698	232.616	45.4377	465.681	80.6313	11251.4	0.54411	267.23	0.573849	0.016551	n/a
C21-2	265.249	197.268	19.2285	2925.54	0.974176	n/a	0.944191	0.0780772	1.9569	4.70037	0.0431309	37.5882	15.7597	215.526	86.0743	411.055	81.0757	829.15	142.429	11633.9	0.741909	395.781	0.477333	0.00696183	n/a
C21-19	273.031	196.46	9.22209	2109.71	1.09657	0.0336456	2.50148	0.117676	1.17188	3.68268	0.139032	30.5918	11.98	164.326	62.2423	293.758	58.494	576.389	99.7653	11287.7	0.625571	323.737	0.561664	0.0277225	5.92092
C21-11	289.499	217.3	16.9063	1655	0.857621	0.0158768	0.934474	0.0713611	1.29316	3.66166	0.12515	26.2809	10.5136	132.366	50.1962	231.575	47.179	500.892	88.2488	11638.4	0.592658	337.119	0.673037	0.0284251	3.73257
C21-4	302.722	207.319	12.6144	2101.18	1.27709	n/a	1.496	0.0591504	0.951114	2.95214	0.167102	26.0606	11.9651	157.064	62.7661	294.309	59.2804	606.324	102.73	11822.4	0.569251	307.148	0.506574	0.0394368	n/a
C21-5	447.07	163.919	7.27888	1455.27	0.718041	n/a	0.809419	0.0590491	1.05626	3.28239	0.0943135	22.3874	8.17704	110.067	41.9966	205.895	41.5295	438.319	77.7614	11919.6	0.57068	463.82	1.05818	0.0249412	n/a
C21-17	471.516	94.1341	7.43629	716.49	7.34387	0.160467	15.4844	0.217621	2.23792	2.79635	0.293445	13.4436	4.52743	56.9671	21.5743	101.061	21.5688	238.305	43.5941	11367.6	3.89154	775.986	3.25627	0.120899	17.0504
C21-27	465.992	112.391	0.455095	646.979	1.69578	0.103908	15.0971	0.116411	1.22462	2.18142	0.851494	10.6069	3.8902	45.4846	17.8064	92.1542	20.0775	235.951	45.9829	9392.27	0.69948	209.321	0.887135	0.445736	29.6529
C21-16	533.62	67.0588	5.0341	1212.54	3.9463	n/a	13.0903	0.0975088	1.3844	3.92654	0.137148	19.84	7.49914	96.0311	35.6891	169.098	35.004	348.34	59.9427	13010.6	2.6293	735.216	2.11063	0.038698	n/a
C21-20	787.087	97.1818	23.9917	1254.16	2.23053	0.321194	4.9656	0.311948	2.4617	3.82761	0.304768	25.4268	8.84103	110.915	39.2426	180.841	34.4799	341.107	56.924	9827.38	0.889726	239.228	0.701327	0.0706512	3.49812
C21-22	620.615	64.8873	2.1331	772.161	2.99858	0.777997	11.4181	0.527995	3.76428	4.31238	0.453081	17.7228	6.07627	66.5918	24.3477	108.877	21.6695	221.174	37.2761	8933.88	0.945048	172.633	0.780529	0.136536	4.2208
C21-24	853.793	158.025	10.3199	182.595	0.236729	0.187914	2.63393	0.140265	1.23643	4.61234	0.988985	19.1751	3.47697	23.5017	5.89266	19.1243	3.04822	31.6713	5.59314	11563.9	0.110393	570.917	18.0263	0.276237	3.79297
C21-6	1061.12	83.8506	12.3509	941.402	2.26165	n/a	24.7836	0.0817164	1.47211	2.71445	0.609649	13.6825	5.59951	69.4661	27.892	137.48	28.5134	311.462	58.4658	10557	1.34108	197.366	0.633677	0.249307	n/a
C21-8	1212.96	202.121	6.09272	2145.88	0.900091	0.342381	2.99625	0.398659	2.75026	6.67287	0.244556	46.4209	16.2764	187.776	65.0737	267.302	49.2924	474.274	76.1312	12044.7	0.562708	520.662	1.09781	0.0312905	1.73579
C21-25	1199.08	248.019	19.0027	2058.85	1.00708	0.438699	5.56428	0.72465	6.5883	9.55223	2.7915	47.3581	16.546	183.525	62.8572	275.554	53.6178	546.823	94.7346	11949.4	0.562613	396.486	0.725072	0.328656	1.91835
C21-28	244.029	472.192	12.0824	2495.41	2.30218	0.259541	3.85365	0.225483	2.44859	5.73596	0.241309	40.4203	15.4131	203.097	77.9465	363.292	71.4403	740.699	119.54	12401.8	0.968005	427.333	0.576933	0.0355321	3.63074
C21-29	2636.11	422.375	10.4407	1630.44	2.75881	4.6041	25.9073	1.83507	13.3605	15.0525	5.4436	52.0837	16.7155	174.751	51.0921	208.58	38.6626	392.279	61.2889	11289.5	1.38647	544.061	1.38692	0.533524	2.18528
C21-30	508.221	375.15	6.51891	934.516	5.74267	0.00612332	26.3796	0.0759652	1.2118	2.63124	0.222597	14.471	5.3116	68.6105	27.4236	141.488	31.1619	362.73	62.3852	12731.9	2.99601	595.303	1.64118	0.0876068	104.435
C21-31	265.741	526.878	8.91791	2872.01	1.60654	0	0.603288	0.0426963	0.904992	3.82015	0.0280652	31.4181	14.552	213.244	84.7777	426.642	87.8465	931.127	152.082	12078.2	0.748587	369.555	0.39689	0.00544133	4.38669
C21-32	253.242	453.264	14.5718	2137.24	1.21052	0.0617604	1.29666	0.134026	1.87638	4.13402	0.303324	27.6828	11.8988	159.819	62.7775	305.765	63.0863	668.807	109.194	12763.8	0.420082	341.407	0.510472	0.0646724	2.53529
C21-33	266.578	474.907	9.04795	2147.87	1.1777	0.00709949	0.725454	0.0364005	0.848258	3.15992	0.0900327	27.4606	11.4026	160.057	63.5479	311.362	64.0802	675.646	111.359	12006.8	0.54016	287.079	0.424896	0.0201228	5.73869
C21-34	251.817	428.389	11.1212	1841.45	1.57323	0.00712429	2.11749	0.0741138	1.64394	4.75432	0.104233	30.6238	11.0423	146.06	55.0614	255.257	51.2562	532.572	86.7029	12339.3	0.668079	340.361	0.639089	0.0199575	8.54091
C21-35	1242.59	363.116	2.66273	1256.38	2.31057	0.00891976	6.05034	0.062546	1.13646	2.52537	0.841444	16.3127	6.21195	85.1337	35.3538	186.096	42.0272	491.283	85.797	10035	1.09564	172.428	0.350975	0.302602	28.4079
C21-36	287.436	461.535	16.4065	2846.94	2.34601	0.298475	3.18825	0.297022	2.60188	5.15603	0.215049	36.1069	15.0238	209.045	82.1145	397.287	81.1287	855.1	138.321	13001.9	1.0339	472.378	0.552424	0.0354127	2.37557
C21-38	1566.36	452.873	14.2356	2085	4.92205	0.013605	26.5575	0.136662	2.33639	5.28405	1.03528	34.1069	12.6402	165.787	63.8064	299.049	60.1894	647.752	109.683	11573.7	2.41845	646.526	0.998106	0.178045	58.016
C21-39	570.161	424.687	6.05747	1077.19	1.67052	0.341875	2.00448	0.286359	2.00503	2.58308	0.335464	15.7232	6.48203	83.3264	30.4261	148.632	31.3149	350.92	59.8838	13493.8	1.12843	723.092	2.06056	0.123858	1.4698
C21-40	676.152	418.743	8.29217	1395.91	1.28912	0.383612	3.70846	0.21519	2.20867	3.26905	0.332979	21.0127	8.00402	106.624	41.9323	199.553	41.0551	443.104	75.59	12326.4	0.693906	357.832	0.807557	0.0928834	3.12046
C21-41	670.855	394.751	12.5097	1416.44	3.42412	0.0751045	40.1334	0.188203	3.36512	7.54361	2.78569	36.851	11.3223	125.244	41.1152	172.504	33.4118	356.885	59.3859	12767.5	0.7255	290.13	0.812951	0.42015	57.0739
C21-42	269.632	451.866	8.21378	2460.34	1.14995	0.0463422	1.29479	0.0898268	1.35462	4.04402	0.119758	33.1352	13.6357	189.742	74.1913	360.511	70.8956	740.489	123.923	12025.2	0.538157	311.533	0.420712	0.0220041	3.70819
C21-43	263.396	414.468	28.0542	3853.97	1.66859	0.600925	7.04216	0.841072	8.3415	13.1429	0.88478	72.5254	25.7886	323.882	117.557	530.662	103.151	1032.47	163.747	11670.4	0.745749	873.352	0.845885	0.0695262	2.0207
C21-45	115.984	365.373	7.0141	134.877	0.555565	0.0090406	3.28157	0.0247901	0.295935	0.450036	0.3208	2.4536	0.761963	9.90604	3.6659	17.9674	4.30228	52.3779	10.4391	6717.87	0.22762	52.4489	1.00135	0.743365	35.8553
C21-46	558.697	418.375	8.99055	424.649	1.36934	0.00800717	25.5814	0.142095	2.40045	3.83714	1.70086	14.5119	3.80913	39.4897	12.7058	55.0989	10.9747	116.487	20.4746	9166	0.348918	62.8436	0.539491	0.612876	54.6573
C21-47	965.992	366.873	3.3417	768.052	2.1055	0.00112651	5.30414	0.0464945	1.04408	2.60263	0.12284	14.1745	5.04768	64.1716	22.9595	106.71	21.0687	215.427	35.5724	10677	0.934257	219.893	1.02073	0.0492618	35.0766
C21-48	1900	595.828	23.3833	1695.85	1.84529	0.260264	2.61596	0.294057	2.94515	5.03372	1.08571	27.9419	10.5854	138.162	49.7264	218.55	43.9653	461.936	74.6225	12252.6	1.04633	952.048	2.06099	0.221699	2.03861
C21-49	3434.88	416.041	5.4571	1575.49	8.27374	0.135294	18.3254	0.367383	4.91113	5.66139	1.91528	25.2405	8.62736	111.275	44.2347	229.482	52.5582	592.565	101.83	12998.7	4.53164	578.577	0.976395	0.413223	13.494
C21-50	951.54	606.917	5.10789	2372.05	7.05348	1.28768	56.8582	0.612383	5.56069	8.092	2.58467	48.1168	15.9141	195.018	71.8056	329.37	67.6622	749.245	126.579	11031	2.16725	1460.48	1.94927	0.310509	15.6415
C21-51	1072.22	454.55	6.76645	1341.7	2.11281	5.23137	25.3922	1.81795	10.209	5.39194	0.859937	22.4494	7.66334	100.958	40.0827	197.328	41.0049	452.892	80.1353	10700.7	0.827608	243.358	0.537342	0.205233	2.01363
C21-52	1227.78	480.736	10.5959	3643.18	1.99181	242.151	540.052	61.4389	243.915	55.6651	0.769835	74.7483	21.6703	276.905	107.146	502.741	102.541	1066.65	173.029	12716	1.41199	826.556	0.774911	0.0364862	1.05779
C21-53	258.39	501.401	13.3052	3328.36	1.43494	0.0817602	1.57181	0.164795	2.39654	6.89716	0.239768	46.5781	18.2453	242.883	94.6081	444.276	89.137	928.967	153.063	12906.9	0.921783	363.739	0.391552	0.030426	2.46993
C21-54	645.439	409.278	30.1314	1917.76	3.51508	0.172707	7.89152	0.11363	1.39051	3.64178	0.13223	25.2136	9.88948	140.459	55.8123	273.167	56.211	612.407	103.128	12820.5	1.85768	514.673	0.84041	0.0311247	13.3982
C21-55	1266.66	534.525	10.933	1360.26	3.03802	1.12082	14.722	1.18632	7.7097	7.80106	3.22808	32.2859	11.0769	123.292	39.409	165.292	33.6548	351.612	57.1659	13788.5	1.94835	806.965	2.29504	0.534912	2.79443
C21-56	3139.82	424.218	61.0774	4502.57	5.91491	4.17233	70.8034	7.61038	55.6442	55.5607	22.2647	154.855	48.3502	474.552	130.438	500.405	94.4587	953.592	151.329	9859.85	2.72654	1765.24	1.85114	0.687519	2.36797
C21-57	810.506	459.527	7.52238	804.648	1.49581	0.311429	10.7128	0.20201	3.08611	6.39016	0.798451	24.4473	7.0615	75.5337	23.5814	105.722	22.8198	270.862	47.6887	12496.1	0.806825	176.988	0.653427	0.171298	10.1757
C21-58	792.027	371.759	12.6936	479.215	1.54008	0.149803	8.14248	0.0932303	0.945559	1.74007	0.363203	8.83105	3.05072	38.1968	14.1971	66.2752	13.7995	148.207	24.8751	11707.9	0.629032	109.94	0.7418	0.230452	16.4922
C21-59	251.542	416.027	11.427	2000.33	1.35275	0.0227409	3.29844	0.175397	2.89264	6.19325	0.135785	37.3848	13.1444	166.611	61.3192	279.231	54.2549	543.503	88.5987	12900.4	0.731868	415.116	0.763778	0.0210532	5.5499
C21-60	252.907	436.504	12.2067	1550.73	1.09055	0.497457	2.50127	0.274218	2.13272	3.08023	0.103633	21.5214	8.60079	116.495	46.3525	221.682	46.3381	493.693	83.7411	12949.6	0.530216	235.519	0.477055	0.0286206	1.63958
C21-61	2436.11	411.33	4.2852	1716.58	8.86094	1.82942	34.414	1.37761	8.71471	7.87772	2.89169	29.73	10.902	137.42	51.6216	246.869	51.441	555.638	90.3683	11052.5	2.70196	874.196	1.57332	0.508327	5.06134
C21-62	2506.48	370.898	7.81272	1214	2.87033	0.0788541	11.9418	0.369216	5.7622	7.72363	1.244	33.6112	9.87744	107.956	34.8254	148.676	28.6101	277.957	44.9679	9746.03	1.08483	141.205	0.508009	0.200414	9.24951
C21-63	1118.21	489.342	7.37373	1720.09	6.78339	0.983066	7.3175	0.869878	7.57671	8.49163	3.03393	33.3647	11.2547	134.277	50.7	250.018	57.3038	659.591	115.122	15552.9	17.7447	1158.23	1.75599	0.48021	1.79738
C21-64	501.626	482.994	36.8671	1431.89	3.90675	120.917	322.455	34.3534	138.988	39.6479	4.53518	58.1487	14.505	135.268	40.857	179.849	37.3809	436.512	73.6898	12579.1	2.92514	1913.61	4.38386	0.288482	1.20871
C21-65	284.672	583.03	10.0302	4428.06	1.77843	0.0376108	1.42603	0.15957	1.79383	6.4425	0.236139	46.6498	22.0051	317.156	126.418	617.685	126.965	1321.46	211.577	11499.4	0.97007	632.271	0.478463	0.0302575	2.53497
C21-66	264.679	446.166	2.97872	947.547	1.51584	7.30314	24.0495	1.69686	7.1124	2.79522	0.640789	11.5762	4.38096	60.0127	25.6707	135.708	31.3271	376.502	71.2971	10889.1	0.685669	487.678	1.29529	0.296191	1.6146
C21-67	956.661	472.765	6.27144	1071.83	0.921345	0.0128946	3.91373	0.0877448	1.62927	5.14189	0.629008	26.8975	8.59613	94.2481	31.0971	134.398	26.7361	296.141	50.1964	12524.1	0.584284	453.027	1.52977	0.131857	13.0772
C21-68	254.244	515.458	8.62107	2357.65	1.15503	0	0.673579	0.037508	0.707282	2.84065	0.0714043	25.1592	11.6966	167.323	68.0305	334.609	69.6755	736.864	123.213	12809.4	0.643086	309.822	0.42046	0.0174631	5.57528
C21-69	260.616	435.581	14.6809	2320.46	1.18849	0.028338	2.43612	0.102074	2.22505	5.1817	0.0844118	32.4136	13.0994	171.684	65.8931	319.826	64.703	665.293	110.517	12748.7	0.690846	435.729	0.654943	0.015192	6.66748
C21-70	394.289	568.951	11.8574	2017.84	0.95717	0.196369	3.40495	0.387993	3.0763	5.38655	1.52574	33.4745	12.1961	155.109	56.3492	276.003	58.2969	639.367	109.81	11949.2	0.895166	400.083	0.625749	0.265582	2.265
C21-72	870.432	419.413	8.90676	2274.84	2.08879	0.259358	4.11458	0.309327	3.6494	6.33499	0.388873	35.1533	13.4171	175.881	66.2269	308.139	61.7938	643.117	105.201	12781.1	2.93353	578.149	0.898979	0.0631128	3.09082
C21-73	1665.73	594.762	11.6039	2942.78	2.30008	0.168973	15.3354	0.211758	2.76032	7.39549	1.53422	43.6607	16.7202	225.188	88.2736	430.321	88.1775	956.85	160.987	11306.6	1.08766	206.041	0.215333	0.202855	17.0345
C21-74	256.638	464.827	9.02601	2632.53	0.930035	0.0219127	1.0895	0.0634536	1.78382	5.43125	0.135227	41.1238	16.9604	218.994	82.4661	391.696	76.6965	780.775	122.497	13347.6	0.497062	390.635	0.500317	0.0197908	4.68238
C21-75	268.449	415.387	13.5726	1260.56	2.74183	0.00729498	4.74139	0.269278	4.36712	7.36372	0.411731	34.4435	10.2035	112.458	37.7693	164.706	32.0515	318.795	51.7837	10235.1	1.48263	773.515	2.42637	0.0658099	5.40776
C21-76	374.188	426.255	11.2169	1968.84	1.07479	0.176071	2.18237	0.216767	1.79892	3.81296	0.424499	25.3546	10.4846	143.367	57.1945	278.184	57.2825	608.712	100.977	12613.2	0.616161	386.239	0.634519	0.098704	2.35792
C21-77	296.598	464.235	11.5446	2483.97	1.24728	0.107996	1.97886	0.140074	2.12575	4.89555	0.474307	35.2759	13.2452	184.054	72.6106	342.765	69.5672	711.081	118.493	11620	0.646013	439.674	0.618318	0.080309	3.35046
C21-78	249.385	529.893	7.66074	3050.36	1.42675	0.0111484	0.836247	0.0456783	0.992814	3.33316	0.0627062	32.1707	14.862	222.284	89.7771	447.478	93.315	980.879	162.797	13503.7	0.775974	462.296	0.471308	0.0121249	5.17716
C21-79	262.966	462.644	12.5291	2870.39	1.17004	0.00330703	1.08681	0.0678017	1.34914	5.01137	0.0927504	39.4966	15.8114	220.006	85.5696	408.93	81.8051	834.153	137.925	12437	0.583148	403.611	0.483857	0.0142177	4.88097
C21-80	471.356	470.69	7.68149	2073.83	2.85608	0.398148	9.46458	0.333114	3.93244	10.2288	1.95532	58.2948	17.5239	194.157	63.7067	267.265	49.0959	484.655	78.4103	10492	0.9416	610.091	1.25882	0.192352	5.96366
C21-81	775.573	411.352	78.0384	118.398	0.871074	0.0530598	2.23552	0.0921781	0.778531	1.36745	0.572622	4.92516	1.40309	13.3684	3.67592	13.1114	2.07147	18.5684	2.68708	10432.7	0.279259	79.8339	4.29945	0.600091	6.11771
C21-83	278.432	355.841	4.26926	352.408	2.17456	0.058142	2.22049	0.149698	1.02354	1.59281	0.291345	4.95535	1.6748	22.6058	9.16722	53.6387	12.8017	174.521	35.3454	11843.3	1.6564	978.878	5.60892	0.290996	3.9847
C21-84	1400	408	6.92393	1154.01	2.60085	0.0569743	31.8707	0.288504	5.27851	6.94777	2.80639	27.5343	8.41937	96.1568	34.2159	152.337	31.8534	337.624	60.2212	10778	0.773353	471.325	1.39601	0.539429	31.7801
C21-85	353.34	562.293	8.71346	1101.17	3.35843	1.50533	6.0957	0.921822	7.2608	6.83876	0.30035	31.8558	10.8647	106.958	31.2935	131.392	26.5377	303.547	50.5404	13438.5	2.55406	1198.93	3.94973	0.0518586	1.24077
C21-86	1368.52	376.778	15.2418	2386.23	4.29887	0.393455	20.5288	0.66217	6.58572	9.72589	0.392361	48.0129	16.0264	199.403	73.4917	346.619	70.3855	740.011	128.295	12202.4	1.58475	437.492	0.591196	0.0455227	7.77345
C21-87	131.747	404.255	7.28401	568.311	0.93713	0.0319728	8.06139	0.117518	1.31283	1.91352	1.1342	10.2136	3.22924	40.3861	16.2438	82.284	18.7149	231.99	47.0982	6742.56	0.338086	85.6845	0.369345	0.628704	19.2023
C21-88	1565.13	473.781	20.6963	1536.71	3.34112	3.16844	28.9136	3.96523	24.0064	17.5666	6.49859	49.129	14.9101	146.538	43.8147	187.248	35.8481	369.633	59.4845	11094.7	1.49361	891.549	2.41198	0.633226	1.71461
C21-89	1364.81	441.412	7.17713	2773.93	1.83234	0.320198	5.16367	0.279055	3.63076	7.65096	0.165669	46.4515	17.5172	232.873	86.448	403.971	79.0607	811.647	129.138	12732.9	0.870525	457.154	0.563242	0.0206947	3.93491
C21-90	271.425	615.284	37.9914	8424.27	9.83928	3.49671	53.2533	5.52752	39.6774	52.1764	6.37286	219.835	69.7032	800.75	269.134	1179.24	220.889	2183.33	348.013	10010.8	3.84402	2872.79	1.31578	0.155768	2.38599
C21-91	285.939	408.856	8.41487	1606.35	1.04814	0.178881	2.2769	0.252917	1.73812	3.61969	0.276051	24.569	9.0752	122.191	48.2467	229.025	47.2728	487.327	83.2612	12017.3	0.473264	262.062	0.537753	0.0664664	2.17757
C21-92	561.658	356.472	8.78347	678.554	4.77717	0	24.988	0.101505	1.76585	3.38482	0.322648	16.1883	5.17263	62.8365	21.4871	96.7697	18.8562	198.77	32.2993	10984.3	1.99153	354.649	1.78422	0.110267	76.4264
C21-93	472.302	391.195	4.5298	1061.99	2.18217	0.00501303	11.2491	0.103866	1.75568	3.18703	0.622017	19.227	6.71558	85.6495	31.8483	158.769	32.1607	353.545	63.3447	10745	1.04606	273.262	0.77292	0.187503	32.9857
C21-94	998.72	353.291	5.7619	2301.95	3.14822	0.01774	10.2146	0.257618	4.69132	10.6624	0.669638	53.9919	17.9902	215.683	74.0279	330.585	62.2505	624.798	99.3706	9838.06	1.36026	173.575	0.277811	0.0694626	11.979
C21-95	262.766	462.737	11.0046	2680.28	0.988948	0.0221717	0.966071	0.0805081	1.3224	4.4633	0.0419547	35.6404	14.8961	209.696	81.8453	390.336	77.9948	813.7	134.598	11737.6	0.515828	358.19	0.440199	0.00714057	3.35502
C21-96	1236.11	423.501	23.521	1362.57	0.836481	0	0.965631	0.0098157	0.617474	2.18746	0.0595175	19.164	8.9002	111.258	40.3642	189.078	37.6963	403.266	65.1111	13412.9	0.723926	575.109	1.42613	0.0190821	30.5416
C22-1-22	117.569	132.792	9.39474	1485.67	6.20632	0.203546	56.7687	0.293911	4.35575	8.67892	4.54573	37.6768	10.7856	121.571	42.3657	189.464	39.0953	431.867	80.3285	8909.44	1.55321	265.813	0.615497	0.65294	46.9354
C22-1-1	126.818	113.185	32.6987	806.325	2.21088	0.0451696	20.5745	0.127724	2.93205	4.11622	2.16785	17.9254	5.35763	62.4584	22.9378	102.581	22.9223	244.241	48.3063	6659.59	0.675714	74.2445	0.303981	0.654974	43.8012
C22-1-5	127.915	128.345	2.29711	1818.13	7.11106	0.00900369	63.2314	0.2442	4.02461	8.46384	4.48109	49.0732	14.1241	155.263	52.8407	243.577	48.4781	524.335	96.1236	8280.18	1.60009	250.07	0.476927	0.525368	79.217
C22-1-6	122.534	208.455	9.54402	1872.07	3.00544	0.519607	12.3634	0.195145	1.75535	3.67188	0.426464	24.8028	10.5335	140.135	58.3595	282.714	58.767	624.397	116.506	10585.8	0.807996	209.028	0.334768	0.101633	9.51429
C22-1-7	125.902	125.297	7.95172	1127.6	4.22076	0.119234	36.5176	0.12945	2.58103	5.34221	2.59943	23.9217	7.90963	87.376	31.7763	152.498	31.132	352.711	67.9964	8398.57	1.09581	181.002	0.513174	0.592344	63.9634
C22-1-8	128.997	166.02	16.2533	3973.85	9.79316	0.132332	122.562	1.70292	24.9915	39.0052	17.1123	132.172	34.9363	359.544	119.124	520.599	103.046	1077.54	195.315	6735.77	2.17989	336.281	0.312083	0.657027	21.6691
C22-1-9	127.437	113.813	6.55842	1301.61	3.73982	0.0173745	33.1773	0.258832	2.72693	6.5656	3.08572	28.3949	9.55335	105.043	37.134	172.07	35.5164	394.709	74.4675	7719.09	1.0058	133.07	0.337136	0.587585	38.752
C22-1-11	126.484	118.527	16.4248	1570.88	8.17636	1.01762	118.735	1.01612	15.7616	15.1837	7.67299	50.2485	13.2886	138.218	45.3557	197.214	39.8486	435.94	80.638	7712.88	1.89668	316.671	0.726409	0.769686	25.8859
C22-1-12	124.265	141.636	12.1769	3233.56	6.16297	0.313688	131.764	1.32848	23.8639	33.2194	14.3607	116.69	29.905	298.444	94.997	390.597	80.9924	835.589	148.231	6841.28	1.43459	400.266	0.479022	0.630859	28.1299
C22-1-13	125.328	101.137	9.19418	773.168	1.21169	0.103225	21.7838	0.458101	4.6216	9.11747	3.52779	25.131	6.53589	65.4383	21.8613	100.935	21.3894	246.69	47.5166	6953.24	0.541683	146.442	0.593627	0.668825	13.54
C22-1-17	125.053	123.419	15.1825	1450.69	6.69129	0.0131082	47.8679	0.091815	2.70453	4.73479	3.10993	30.3197	9.62694	114.725	41.3322	190.707	40.6251	446.723	84.5158	8404.32	1.61943	189.223	0.423581	0.600821	153.096
C22-1-19	127.247	116.143	8.72346	1149.11	3.49303	0.0549118	28.605	0.153502	2.0941	4.67382	2.68119	23.7891	7.53072	85.4052	31.9351	150.897	32.3758	367.033	70.4593	7962.64	0.986593	122.642	0.334143	0.631912	50.5983
C22-1-21	126.991	97.1264	6.08113	772.193	1.15707	0.0759558	23.1898	0.424589	6.39276	6.18456	3.85464	23.2482	6.10809	62.6459	21.5713	99.5941	21.1892	246.821	48.3204	6290.91	0.482894	143.605	0.581818	0.865626	15.8217
C22-1-24	128.637	114.803	7.48214	1361.22	3.15089	0.0429513	34.94	0.320049	3.52987	6.68084	4.16971	34.0345	10.2071	110.693	40.3704	173.401	37.1237	390.756	73.3477	7032.08	0.960411	153.425	0.392635	0.687026	32.1628
C22-1-25	129.016	85.1603	3.05118	1062.85	2.39668	0.0445095	32.1091	0.268623	5.45589	7.67376	3.66563	28.4923	8.25152	85.4265	29.8503	134.384	29.1017	328.84	61.7061	6587	0.854799	102.909	0.312946	0.669483	34.7985
C22-1-4	137.742	108.558	20.1558	1857.36	2.60767	0.0564936	34.6137	0.426784	6.62538	12.8998	5.72736	51.7804	14.2747	159.432	53.9682	243.752	50.0319	537.178	103.685	7476.09	0.798097	205.67	0.382872	0.587285	23.9105
C22-1-10	140.413	114.369	11.7255	1367	4.60477	n/a	38.1336	0.168916	3.09422	6.02483	3.02455	31.1382	9.93486	110.147	39.9754	183.446	38.4954	422.468	77.9493	7801.25	1.04742	152.753	0.361573	0.546326	n/a
C22-1-14	135.734	122.863	3.60535	1201.38	4.0834	0.0544479	37.0616	0.14742	2.79657	6.0063	3.19186	28.8946	8.26423	97.6723	33.8036	157.52	33.6485	375.849	70.8447	8272.62	1.13696	165.433	0.440157	0.611934	67.9845
C22-1-15	134.278	135.292	4.68646	2148.96	2.8334	0.0526574	45.709	1.00713	15.7395	22.331	10.5697	78.5436	20.1068	201.417	64.6303	276.352	55.0579	588.789	107.33	7368.08	0.983842	168.645	0.286427	0.690076	13.801
C22-1-16	130.812	116.163	n/a	1243.21	3.25284	0.0254702	30.8167	0.289616	2.58782	6.63378	3.1694	30.362	8.80571	100.105	34.8921	163.679	34.754	376.051	71.8833	7899.27	0.996222	126.177	0.335533	0.571883	31.9095
C22-1-20	137.579	98.8718	17.3772	880.139	1.51203	n/a	26.6598	0.278626	3.87759	7.32798	2.64423	24.6833	6.77024	72.584	24.9665	115.155	24.3768	264.977	50.2752	7946.17	0.898297	126.024	0.475606	0.542712	n/a
C22-1-2	147.289	115.613	4.74912	1278.75	2.32697	0.31959	47.2861	0.504056	6.42621	11.6199	5.64908	38.0953	10.2415	104.576	36.5568	169.474	36.5978	411.816	85.7622	5931.68	0.747346	204.579	0.496773	0.745413	23.2224
C22-1-3	145.376	79.4998	10.3175	770.053	4.62996	0.125318	37.0202	0.306977	3.30429	3.86299	2.06209	17.2639	5.17083	58.1986	21.7215	100.932	23.5977	258.22	45.1729	9256.97	1.48103	137.481	0.532419	0.650814	32.1749
C22-1-26	131.142	412.409	8.18519	2435.95	8.46243	0.0683948	78.8651	0.258998	5.12003	8.18173	4.67765	43.3786	13.8999	170.966	65.8815	334.934	72.8765	862.29	158.798	7403.84	2.42187	422.605	0.490096	0.609677	85.4857
C22-1-28	123.989	407.798	8.47578	2142.62	11.9276	0.0158444	81.4171	0.187462	3.81068	9.06852	4.13647	50.1101	15.5505	177.291	61.4053	285.537	58.5485	652.079	112.648	9620.41	2.68046	369.355	0.566427	0.470568	130.417
C22-1-29	126.24	338.453	11.783	897.828	2.54583	0.0342049	27.2741	0.130044	2.00097	3.31378	1.84281	18.8754	5.43541	64.5826	23.5577	114.518	24.5604	290.685	52.6368	6317.12	1.02058	285.244	0.981283	0.559823	58.9022
C22-1-30	123.865	404.713	7.89594	567.248	1.28754	0.0264142	13.6765	0.107692	1.3264	2.13762	1.31305	9.72822	3.09431	38.1215	14.9778	78.423	18.1547	232.605	46.8496	7808.92	0.550647	186.024	0.799742	0.738495	35.8977
C22-1-31	125.686	380.675	15.2168	1355.72	2.15398	0.0602222	15.6504	0.388015	5.54615	8.09115	3.27423	36.2509	10.1484	112.706	38.7215	172.913	35.0191	390.914	66.3163	7574.31	0.900355	139.32	0.356397	0.492416	11.7888
C22-1-32	131.438	343.969	7.81452	553.046	1.51213	0.0254414	21.1719	0.10159	1.43101	2.49755	1.28572	11.6329	3.36092	39.8095	14.522	72.2055	16.0999	195.244	36.2486	6201.52	0.538552	164.283	0.841426	0.607901	58.7986
C22-1-33	133.702	418.246	22.265	4035.96	93.3598	1.41523	54.3061	0.517354	4.5691	8.36335	0.868346	53.5039	21.2902	290.249	112.976	562.668	118.708	1335.08	214.521	14780	28.4178	2925.26	2.19107	0.0950504	15.5441
C22-1-34	129.647	381.905	15.0123	3581.91	7.63482	0.781263	202.598	4.91113	63.5637	58.7677	25.6902	158.931	36.5764	343.78	104.375	445.803	88.1933	976.469	164.127	5726.74	1.19651	414.526	0.424515	0.765336	12.0396
C22-1-35	130.1	381.961	7.8457	1526.62	2.81414	0.0480351	29.1549	0.403689	6.08324	9.98349	4.59354	39.5451	11.2729	121.489	42.217	200.902	42.7061	511.546	92.7427	9232.98	0.949654	207.425	0.405487	0.614696	21.4009
C22-1-36	131.305	391.196	10.6519	4798.53	20.9117	0.169039	153.953	1.37369	20.3153	34.3119	7.29697	146.467	41.0469	429.871	135.577	564.753	106.32	1094.81	163.259	10752.9	10.8525	2104.05	1.92185	0.268538	33.1581
C22-1-37	121.494	378.585	13.2412	1713.5	3.43653	0.0935355	64.8736	0.330631	5.92601	11.3545	5.73503	49.4534	13.5936	145.6	49.2103	219.721	44.5669	506.754	87.5542	6738.77	0.884172	244.699	0.482875	0.628084	54.7111
C22-1-38	121.915	366.635	12.4198	1088.65	2.58851	0.0777763	23.315	0.217074	3.63901	5.63137	3.01044	26.6638	7.72827	88.3238	30.4641	140.914	29.555	345.739	62.0584	7257.52	0.81045	97.8891	0.28313	0.62326	29.1574
C22-1-40	121.249	387.314	7.39784	1455.94	9.67189	0.0846325	66.8439	0.175038	2.83705	5.89863	2.75488	30.8734	9.84967	114.833	40.8382	191.938	40.508	467.163	82.6718	9656.78	2.42103	455.009	0.973982	0.503185	99.3108
C22-1-41	128.147	357.846	11.5389	1302.91	2.22875	0.0939392	26.2359	0.623205	9.21741	11.5019	5.85783	43.0646	11.3772	118.637	38.2115	169.723	34.3649	391.239	67.8867	7156.17	0.856748	129.294	0.330473	0.709409	12.3251
C22-1-42	137.059	391.147	8.30585	1407.96	6.64719	0.0409709	52.1711	0.160118	2.91896	5.28411	2.86767	30.4081	9.32486	109.204	38.7742	184.181	38.2852	460.263	82.4971	9050.82	1.78488	277.284	0.602448	0.541813	91.7459
C22-1-43	130.584	377.965	9.85974	1260.85	3.21637	0.0267481	28.6295	0.190655	3.06412	5.8439	2.95983	28.4848	8.76438	101.633	35.5586	168.905	34.7932	409.497	72.5407	7861.21	0.85953	123.1	0.300613	0.577254	44.1373
C22-1-44	133.461	391.054	56.1358	1339.07	4.85438	0.580294	42.0072	0.469718	5.02869	8.33063	3.96678	36.3957	9.97677	112.767	37.8615	175.352	35.7593	413.81	75.6754	8144.66	1.00534	218.027	0.526877	0.590721	18.569
C22-1-45	123.88	354.849	7.77513	663.993	1.05601	0.0639373	22.3615	0.159796	3.08686	3.76932	2.10862	16.1357	4.51542	49.8962	17.8195	89.8824	19.7076	246.184	45.5893	6804.96	0.383801	70.9261	0.288102	0.704868	37.4399
C22-1-46	136.482	372.285	7.00916	1168.26	5.0803	0.00883121	29.3508	0.131822	2.39641	4.99417	2.38364	26.114	7.80891	91.638	32.3545	155.465	33.0005	390.398	69.4324	8659.34	1.44284	186.093	0.476675	0.514627	67.3172
C22-1-47	126.015	392.48	25.9365	1911.31	13.1491	0.0132694	67.2825	0.152969	2.3912	4.5827	2.44473	27.0783	9.54558	126.053	50.7082	262.628	59.5357	735.152	136.085	9612.68	3.43232	602.869	0.82006	0.521278	131.964
C22-1-48	121.539	347.751	7.53947	1238.64	1.63817	0.0485302	18.5198	0.341695	5.31024	9.22771	5.05943	36.3929	9.98465	105.942	35.7098	163.728	33.8037	400.316	69.4321	7440.48	0.712596	91.223	0.227877	0.734873	15.9204
C22-1-49	128.201	365.647	24.2077	3790.76	11.2449	0.0697063	102.344	1.02158	21.6044	42.9765	20.0226	149.879	36.5387	357.966	109.264	460.192	88.5897	970.263	160.474	6466.63	2.50141	337.377	0.347717	0.683445	30.2743
C22-1-50	134.475	366.96	11.9071	1733.47	4.59201	0.295369	68.0042	0.325478	4.46166	10.443	5.16445	46.5484	13.1177	139.245	47.4113	217.474	44.7485	506.436	89.1921	6870.83	1.23789	331.386	0.65435	0.604151	47.5639
C22-1-51	133.047	376.631	7.90514	2057.96	12.627	0.0230511	92.3876	0.212033	4.02817	9.05293	4.1878	48.3278	14.8044	166.404	58.4749	270.357	55.3449	630.729	107.855	8950.61	2.8767	390.18	0.618618	0.49061	129.625
C22-1-52	130.852	351.579	10.3981	2348.46	4.25846	0.195185	55.2918	1.0734	16.6285	22.6422	10.6905	77.2241	19.8769	209.767	67.8386	300.542	61.1082	697.352	119.082	7202.99	1.25344	210.802	0.302289	0.70381	14.9055
C22-1-53	117.887	415.15	16.5649	4458.95	7.66451	0.729989	177.683	4.12217	52.4844	55.3521	24.0077	171.885	41.47	408.82	127.723	551.317	107.513	1177.69	195.578	6767.5	1.51352	482.432	0.409642	0.690913	12.4951
C22-1-54	132.711	378.194	9.0323	1249.02	3.3084	0.0498613	28.7304	0.169598	2.8176	5.25781	2.89171	26.3186	8.11967	94.5512	34.4952	162.967	34.6527	406.493	72.7028	8127.17	0.945907	132.185	0.325183	0.613869	47.0479
C22-1-55	129.604	382.225	7.92026	1679.94	9.75408	0.0134756	69.9313	0.176687	3.247	7.77237	3.56936	40.5011	12.0257	137.112	47.6597	219.245	45.6324	518.95	89.5069	9288.79	2.1142	323.728	0.623814	0.496525	119.232
C22-1-56	122.847	372.141	8.62978	1155.69	4.30709	0.0825673	36.5776	0.130788	2.23092	4.25415	2.32149	24.1689	7.48982	88.5074	32.1008	153.756	33.4584	395.515	70.2007	8916.08	1.35802	158.692	0.40123	0.550502	69.2912
C22-1-57	129.554	359.483	8.65992	1170.52	2.32882	0.0405025	21.1061	0.314924	5.02528	6.63173	3.10651	29.1813	8.19136	94.7035	33.258	155.601	33.3164	388.396	68.89	8022.89	1.13912	222.957	0.574047	0.577951	19.7867
C22-1-58	125.31	364.948	6.72951	1357.31	8.65542	0.0201166	58.2688	0.222571	3.64209	6.53086	2.9214	32.4431	9.2821	106.211	37.0449	177.832	37.8036	447.618	79.6358	8652.31	2.48304	299.662	0.669459	0.502286	78.4355
C22-1-59	123.063	373.544	6.08337	1134.44	6.25596	0.0391204	48.7885	0.110669	2.55728	4.65475	2.47345	26.4869	7.73163	89.5642	32.0216	148.479	31.6588	367.478	65.4096	9287.03	1.68343	267.501	0.72794	0.535369	119.879
C22-1-60	248.714	522.469	8.59152	1408.49	0.865061	0.0358918	1.19361	0.111565	2.26434	4.93846	0.337248	32.5962	11.4832	134.05	47.1375	198.418	39.4542	394.515	62.3745	11636.5	0.526386	313.947	0.795779	0.0609192	2.9421
C22-1-61	127.572	369.98	6.85187	945.156	1.3859	0.0283415	25.1443	0.236659	2.90439	4.58144	2.35829	20.553	6.12051	69.9455	24.9979	119.892	25.9883	321.949	60.895	6064.53	0.556076	236.336	0.734079	0.625741	31.4743
C22-1-62	125.219	395.123	4.56755	1659.97	3.46423	0.170271	53.0675	0.926444	13.0134	15.5314	8.92925	52.4421	13.327	137.627	45.5534	206.158	44.3863	533.533	96.7717	6675.34	1.3253	840.429	1.57521	0.863193	16.5631
C22-1-63	128.154	389.167	16.0609	1431.31	7.07118	0.128183	59.8645	0.293671	4.81292	8.58088	4.82704	37.6354	10.4953	116.001	40.126	184.843	39.4058	446.06	82.9322	7493.34	1.82349	273.023	0.612078	0.695788	53.8624
C22-1-64	137.249	368.596	10.1142	1139.66	5.42145	0.00505785	42.0261	0.116137	2.27393	4.95221	2.64149	26.1733	8.01977	91.7784	33.3868	153.729	32.2	374.798	67.6972	8496.96	1.43919	236.23	0.630287	0.570243	110.416
C22-1-65	119.837	366.128	7.41267	1940.26	15.8966	0.0357121	92.4758	0.305396	5.20643	9.38389	3.97573	48.5898	14.3903	163.104	56.1387	251.093	50.8837	573.966	96.4673	8593.34	3.12988	525.113	0.914884	0.460389	89.7994
C22-1-66	124.053	377.597	9.55127	1299.51	5.22014	0.0307066	43.3374	0.121438	2.32623	4.91655	2.46713	28.3132	8.84671	103.202	36.8651	174.908	36.3764	422.052	75.804	8648.56	1.51536	196.382	0.465304	0.500693	100.596
C22-1-67	119.695	361.984	8.43844	876.336	3.10543	0.00720976	27.0653	0.0860905	1.59542	3.08394	1.74623	17.76	5.62671	68.2827	24.9997	118.052	25.1375	296.413	54.6743	8689.32	1.00089	139.664	0.471181	0.564976	94.4322
C22-1-68	128.794	360.131	11.2296	644.863	2.15161	0.258237	18.9787	0.195307	2.32584	3.45121	1.64471	15.3919	4.5473	51.8697	17.8495	85.3201	18.1775	215.363	40.4318	8590.1	0.691033	100.837	0.468217	0.581942	19.7179
C22-1-69	118.12	357.212	15.1059	1309.96	3.05241	0.554928	44.6482	1.24195	13.8681	12.6856	7.05126	39.4112	10.1383	110.072	37.1106	169.732	34.1113	394.582	70.7813	7283.31	1.10077	204.901	0.519285	0.885154	9.46565
C22-1-70	124.691	371.005	6.42108	1120.31	5.03788	0.00998523	38.9561	0.123642	2.19805	4.63146	2.15847	24.8275	7.30946	88.1923	31.5908	149.616	32.2327	374.641	68.5557	9177.69	1.40562	195.815	0.522673	0.492634	94.7491
C22-1-71	121.696	370.183	8.04538	860.494	1.55236	0.0221999	15.3187	0.186219	3.21789	4.64783	2.31335	20.3395	5.82347	66.3168	23.5277	114.598	24.8349	301.741	55.3544	8265.27	0.590985	86.369	0.286235	0.616687	24.3742
C22-1-72	119.964	365.221	7.343	1896.6	23.8865	0.215604	97.8984	0.500982	6.69784	9.83551	5.23416	45.9645	13.6011	154.092	54.0447	247.431	51.8458	593.81	101.794	9623.68	5.95933	729.706	1.22885	0.626791	51.7416
C22-1-73	120.075	380.434	9.38788	1484.6	10.9136	0.0500126	85.015	0.323921	5.75494	9.70798	4.27607	41.9466	11.5887	125.354	42.3303	190.711	38.9051	443.876	77.4281	8909.97	2.50119	450.416	1.01473	0.551072	76.7326
C22-1-74	124.635	407.319	6.09699	1895.15	3.31218	0.141656	39.7168	0.808375	12.6454	18.9716	9.07878	64.8628	16.4022	167.519	53.6385	236.688	48.3273	562.515	99.2832	7479.01	1.08078	451.921	0.803395	0.7121	14.2522
C22-1-75	128.048	353.402	19.1574	554.509	1.28463	1.23876	14.0649	0.518121	4.34258	4.50525	2.06344	15.4577	4.09827	44.6277	15.1663	72.496	16.135	195.625	36.9528	6905.09	0.526902	130.45	0.666834	0.679811	4.30343
C22-1-77	134.402	364.12	21.0208	2758.58	5.20415	0.645126	100.226	2.81774	35.4117	37.4371	15.72	113.419	27.1183	265.389	81.4783	341.927	65.6966	710.653	119.295	6431.64	1.01794	281.541	0.396172	0.680475	10.1146
C22-1-78	129.577	378.353	7.74685	1925.31	11.9165	0.0234534	79.8995	0.246001	4.83055	9.19477	4.16279	45.6999	13.5889	157.11	54.9505	253.624	52.7918	607.432	106.003	8752.8	2.81223	350.394	0.576844	0.508158	97.123
C22-1-79	124.447	401.327	9.1315	1889.33	10.2806	0.0242439	71.5645	0.170509	3.10385	7.17906	3.57687	42.5237	12.9167	151.433	53.2969	245.889	50.8494	583.009	102.646	9173.15	2.27686	336.838	0.577758	0.485879	123.276
C22-1-80	128.496	376.357	7.27654	1614.02	5.20682	0.0851354	50.6197	0.334128	5.23871	9.28029	4.3064	40.5971	11.4765	133.04	44.9547	206.928	42.7664	492.325	86.9713	8798.12	1.48194	215.276	0.437264	0.575103	42.6751
C22-1-81	130.303	372.602	11.7486	1649.45	3.05163	0.0519023	48.9447	0.23749	5.18387	10.5311	5.7745	49.9836	13.9301	137.355	46.7121	202.735	40.7954	445.123	80.7881	6790.76	1.06841	321.43	0.722116	0.638085	58.8291
C22-1-82	123.011	371.419	9.39402	1004.97	2.09154	0.0166791	18.6687	0.152069	2.89077	4.86347	2.54262	22.9673	6.9655	79.9489	28.6444	137.165	28.8814	341.166	62.6071	8014.39	0.675294	92.0765	0.269888	0.610772	36.508
C22-1-83	125.384	369.262	11.6747	918.818	2.46816	0.0106202	19.4141	0.111759	1.74272	3.61396	1.86802	18.18	5.67427	67.3226	25.505	121.931	26.2109	307.331	56.7307	7412.63	0.830231	86.4553	0.28131	0.574679	51.9519
C22-1-84	130.858	378.839	17.1606	1184.52	3.9175	13.7206	61.9228	3.60618	16.6338	6.67465	2.90603	27.4894	7.98606	93.4571	33.1659	154.409	32.0799	382.245	69.0266	8534.01	0.989838	154.16	0.403302	0.56489	2.11118
C22-1-86	125.938	381.974	7.51559	1374.6	4.64087	0.0513847	42.9598	0.219109	4.01047	7.38232	3.63814	34.2493	9.96104	112.537	38.9066	179.56	36.8952	430.953	75.8722	8705.26	1.2396	173.55	0.402713	0.583737	55.6397
C22-1-87	127.996	370.257	12.497	3525.13	4.77	0.332405	116.45	2.08502	31.3486	36.7945	16.249	121.663	30.1229	312.652	101.296	447.668	90.783	1017.35	176.14	6677.29	1.1307	291.743	0.286767	0.673029	16.2977
C22-1-88	123.076	396.727	6.00465	1675	5.39786	0.0353765	66.3957	0.255909	4.82382	8.54868	4.09171	40.7703	12.2542	140.502	47.5292	211.498	42.4202	482.752	80.3017	9016.03	1.45292	284.196	0.588699	0.554898	76.3195
C22-1-89	137.579	360.129	15.5247	2593.54	3.66209	0.0855917	78.0599	1.01818	14.6667	23.629	11.1861	82.9021	22.215	216.841	70.4701	315.908	65.5639	711.64	127.137	6930.56	1.07011	261.451	0.367392	0.691447	23.0257
C22-1-90	126.453	403.83	5.44075	1494.9	1.6153	0.0936923	31.4193	0.551868	8.10058	12.981	6.94021	46.1901	12.4673	131.636	42.8931	192.912	39.356	449.249	78.1117	6700.58	0.89108	456.361	1.01583	0.772958	16.5489
C22-1-91	127.652	357.404	2.73491	479.552	1.00646	0.0301622	11.9316	0.118463	2.07117	2.82175	1.58949	11.6651	3.28977	38.1196	13.3722	62.3815	13.471	165.956	31.5328	9744.95	0.479155	244.246	1.47175	0.728786	28.3736
C22-1-92	250.26	472.975	4.21406	2368.54	1.47282	0.0139891	4.2448	0.156957	3.23041	8.21769	1.78321	45.0379	15.4957	195.755	71.9172	341.614	67.8247	743.248	122.149	13069.6	0.834412	552.648	0.743558	0.225343	8.10652
C22-1-93	130.997	389.866	7.77714	1367.35	6.22173	0.0444399	51.1	0.219072	3.64003	7.14241	3.47225	34.9642	9.65587	111.725	38.8355	175.86	36.5426	425.7	75.2568	8834.46	1.55201	285.448	0.670538	0.55221	66.9706
C22-1-94	123.213	390.302	8.0188	1137.82	4.05676	0.0631858	35.0781	0.216733	3.50816	5.49662	2.83605	25.9689	7.8628	90.0337	31.5617	146.561	31.6557	368.466	67.1707	9059.46	1.23202	188.586	0.511815	0.602574	44.9898
C22-1-95	118.651	398.272	3.68447	1505.22	1.8965	0.0841309	19.4007	0.326161	4.7728	7.32814	3.78368	35.441	10.5147	120.454	42.9496	202.381	43.3261	515.562	92.8437	8107.43	1.14769	781.452	1.51573	0.592088	16.7361
C22-1-96	125.391	385.492	9.08905	1256.31	2.1404	0.0229717	25.5412	0.233249	4.07545	7.43892	3.52197	32.1009	8.97462	101.89	35.6305	166.48	34.4735	398.379	70.6114	8116.06	0.712164	117.381	0.294647	0.592919	32.7047
C22-1-97	129.444	350.763	16.2033	792.759	2.54645	0.215541	28.4675	0.187312	3.56185	4.61169	2.1765	18.8416	5.34621	63.1758	22.1139	104.61	22.322	267.467	49.7601	7454.98	0.831534	180.952	0.676542	0.616044	32.2894
C22-1-98	123.358	355.578	13.6426	2240.07	2.77961	0.215061	61.4066	1.33258	21.9484	25.5313	11.5896	84.0156	20.5605	205.851	65.5164	290.374	58.5629	647.306	111.943	6724.86	0.764409	208.981	0.322847	0.694177	13.437
C22-1-100	124.284	378.726	12.7827	1265.37	4.20049	0.400432	43.9571	2.07045	12.3166	10.7108	6.93818	34.5503	9.1629	104.12	35.8993	168.033	34.5092	398.627	71.0417	8032.18	1.01546	140.756	0.353103	1.00468	6.11702
C22-1-101	126.506	373.152	9.88842	1140.42	2.41819	0.0145057	22.3289	0.174073	3.02384	5.89909	2.94887	26.3452	7.97487	92.2449	32.7166	154.034	31.7704	378.38	66.9606	7863.29	0.72375	104.886	0.277197	0.609781	38.5362
C22-1-102	120.416	351.081	8.37993	997.512	3.35989	65.1903	180.862	18.4289	80.5052	16.1848	4.31738	29.3278	7.37295	79.871	27.7681	130.746	27.5086	325.738	57.9053	8729.57	1.08007	142.227	0.436632	0.599102	1.2601
C22-1-103	125.754	395.424	10.7123	1452.41	5.19004	0.0205412	40.2317	0.131487	2.80031	5.00113	2.90871	27.0106	8.52764	105.991	38.9719	194.048	41.9262	502.476	94.3152	8504.32	1.62344	626.118	1.24606	0.611121	89.3943
C22-1-104	184.432	367.265	11.882	1510.17	4.04311	4.27801	20.8626	1.46642	10.0329	7.99956	1.05099	36.7232	11.4403	136.541	47.8638	211.402	39.4674	408.114	64.537	9523.22	1.72269	152.145	0.3728	0.156896	2.03598
C22-1-105	124.371	418.305	8.64581	2162.7	4.9265	0.209963	48.9429	1.02689	14.6159	20.3481	11.9312	73.5903	19.0579	197.505	62.2087	271.46	55.1622	631.107	110.582	6522.41	1.31169	383.744	0.60805	0.837759	13.6759
C22-1-106	123.673	354.679	7.83397	664.704	1.34462	0.0396339	15.9851	0.172182	2.6392	3.82549	1.81654	17.0021	4.44242	50.7817	18.2071	87.252	19.0398	229.142	42.7178	8063.96	0.56447	81.2887	0.354752	0.581401	26.3876
C22-1-107	128.809	403.679	3.45467	2256.32	3.43444	0.165289	27.8624	0.61689	7.21879	12.4067	7.23735	62.7221	17.5273	194.969	65.4738	297.175	62.4003	723.471	127.732	6835.64	1.31477	1101.19	1.5221	0.646024	12.6622
C24-2	13.1565	218.158	10.06	3495.58	2.69162	3.36253	55.26	1.09235	11.0471	15.3914	6.56093	68.0425	20.6982	260.26	98.3699	492.859	112.392	1292.24	255.851	8503.78	0.683779	425.321	0.329135	0.524059	7.03052
C24-8	15.0489	232.491	15.4735	1580.4	2.16023	n/a	15.5879	0.0918961	1.70983	3.99281	1.08364	22.4936	8.19682	108.962	46.6362	237.376	53.2035	613.885	119.047	8406.22	0.367138	165.714	0.269943	0.275658	n/a
C24-11	14.3068	128.803	9.94006	1100.8	0.913609	0.035028	13.4879	0.0838028	0.634789	2.46703	1.54614	16.1173	5.71072	77.5491	30.915	160.563	36.7254	437.122	91.5578	7520.71	0.652221	323.852	0.740874	0.563858	42.7971
C24-13	14.7223	136.059	n/a	1267.04	0.937919	0.0258602	10.397	0.0655771	1.49277	3.84492	0.910602	19.8996	6.64216	91.4327	36.4623	192.168	43.8254	522.394	102.926	10879.7	0.688844	164.938	0.315734	0.257451	42.5033
C24-14	14.3802	132.134	15.5958	1257.38	0.815005	0.0400571	9.45267	0.0602257	2.53222	4.31917	1.47701	23.1875	7.90398	101.137	38.2995	182.481	39.4366	431.441	78.1536	9052.67	0.220973	96.0586	0.222646	0.361052	38.471
C24-22	14.9341	133.106	12.4997	1514.67	1.74912	0.0973404	13.6778	0.094126	1.74136	4.66101	1.31915	25.7875	9.20041	109.901	44.632	214.876	45.9632	508.359	95.72	9169.16	0.43677	130.278	0.256272	0.291682	31.893
C24-24	14.4069	145.735	6.65107	1000.06	1.4457	0.037505	9.72607	0.000480194	1.2851	2.09409	0.919227	14.9173	5.16586	70.3219	27.8913	146.753	32.7945	390.762	75.5656	8832.55	0.433389	105.595	0.270228	0.367391	194.635
C24-26	13.9869	186.988	15.8439	2636.97	2.93147	0.145332	45.5963	0.345248	7.30841	11.45	2.14323	64.0879	19.8488	224.483	83.53	377.343	76.0935	817.395	148.371	9318.11	0.677661	325.281	0.397948	0.191116	35.0821
C24-27	14.5907	102.813	n/a	947.084	0.847	0.0276198	6.19039	0.0672966	1.26058	2.90059	1.06835	16.1993	5.13004	64.3593	26.8695	138.069	31.6907	384.18	77.5679	8353.06	0.344434	105.048	0.273434	0.376734	24.5235
C24-28	130.853	87.2489	3.65189	1837.77	7.21979	0.438598	31.9402	0.756977	6.99144	7.40072	0.908136	37.5555	12.7618	151.263	57.2592	259.199	50.7213	481.891	83.482	12426.1	2.25258	363.692	0.754719	0.135491	10.6306
C24-5	259.115	140.626	57.7888	1170	1.9425	0.392322	10.4528	0.718285	5.31562	10.3427	2.64819	35.1272	10.3068	107.994	34.3934	153.92	31.9543	361.47	65.9791	11143.2	1.1664	1048.15	2.89969	0.382825	3.70644
C24-12	261.474	145.501	10.1644	871.047	1.32656	0.300997	7.77106	0.171698	1.74264	2.76601	0.363354	14.2659	5.35678	62.7289	25.1688	123.52	27.5263	317.18	62.3145	10721.2	0.862912	967.803	3.05127	0.143196	8.25237
C24-18	240.073	138.064	32.4512	2234.26	0.97447	0.844841	4.06596	0.497007	5.22014	7.86906	0.138431	40.303	15.0683	180.567	66.4226	304.363	58.5774	593.416	98.3264	11576.5	0.609782	573.136	0.965825	0.0192826	1.51056
C24-23	250.65	162.465	14.8732	2115.91	0.982141	0.166077	1.33312	0.0985468	1.69343	3.90541	0.0314028	28.1403	11.4948	158.644	63.4275	302.786	60.9701	608.755	104.734	11481.6	0.539983	334.398	0.549315	0.00666529	2.50655
C24-7	292.675	116.478	6.24983	8150.82	1.98575	0.152622	154.778	0.91144	15.364	28.4044	2.10282	143.467	44.9033	537.44	187.182	832.403	171.818	1815.89	289.897	13889	1.61209	32.2693	0.0177705	0.0820459	49.4048
C24-1	909.836	173.261	n/a	1083.46	1.59406	0.870837	36.1716	0.361181	3.51137	3.73151	0.630852	20.4341	7.39932	93.3646	32.6725	151.302	30.5609	333.12	60.968	10629.3	1.14563	430.804	1.29324	0.17568	15.811
C24-19	1007.45	121.551	n/a	756.969	1.09917	n/a	7.9834	0.0567648	0.951866	1.65847	0.692715	10.3014	3.34386	47.118	19.961	110.971	26.7317	335.804	70.8155	10051.6	0.663498	515.306	1.53455	0.391791	n/a
C24-25	1349.99	146.546	9.50396	1109.09	1.55219	0.018535	5.58507	0.0573931	1.4906	4.13852	0.316496	23.256	7.60451	90.8601	34.8324	155.991	30.9852	306.627	53.6725	10191	0.834746	247.814	0.808194	0.077834	26.7488
C24-29	1783.34	110.704	n/a	915.411	1.12293	0.123825	23.9035	0.228472	2.02577	3.94554	0.753909	16.7559	5.51699	67.5075	25.9839	130.01	28.9598	333.751	63.768	11139.1	0.764934	308.621	0.924704	0.242226	26.6841
C24-30	1713.27	126.95	12.8204	1269.21	1.25711	0.243771	15.5698	0.410415	4.76339	11.7054	4.47078	44.7561	12.7448	120.462	37.3298	159.101	31.5818	335.335	61.2721	10613.7	0.689975	565.515	1.68642	0.523841	9.51286
C24-15	2442.59	156.286	10.3153	1138.33	5.12658	0.216314	73.1217	0.375827	3.77243	5.73107	1.87714	28.899	7.97174	90.8829	33.5718	148.461	31.411	337.521	61.2209	9467.97	1.09889	495.088	1.46684	0.363471	49.0799
C24-31	248.808	434.523	10.1396	1893.49	1.54042	0.0167461	1.98697	0.0896585	1.90049	5.16858	0.252745	33.4091	12.1133	156.617	57.8575	264.996	53.6442	542.031	88.5095	11707.7	0.742912	386.908	0.713811	0.0443853	6.40097
C24-33	437.726	382.2	8.24417	638.441	0.94743	0.0440613	10.0303	0.086652	1.50039	2.929	0.531405	13.5785	4.34954	51.6078	19.8613	92.6518	19.4856	217.608	41.1588	8663.4	0.242684	152.791	0.702139	0.215025	29.852
C24-36	271.792	449.667	11.5193	2000.56	1.19022	0.0995185	1.32364	0.142917	1.43579	3.30519	0.199928	26.3645	10.9516	155.218	62.1935	303.152	62.4645	644.621	107.051	12906.3	0.572605	308.607	0.478742	0.0459922	2.2479
C24-37	392.096	418.108	15.9075	1014.56	1.89198	0.53086	5.74213	0.668713	5.47038	6.51396	1.28264	29.0095	9.284	100.313	32.6544	139.768	28.701	288.026	49.2549	13487.2	1.09335	941.872	3.2701	0.240715	2.02232
C24-39	1532.41	391.828	18.1376	1642.22	3.14421	0.95571	23.8877	1.20949	11.1983	11.7716	2.37897	43.4693	13.0897	150.307	51.6507	228.407	44.8075	452.673	75.3269	9731.86	1.41812	526.326	1.16271	0.284377	4.65666
C24-41	1602.16	397.095	9.69271	398.655	1.96474	0.0144367	23.5118	0.0677432	1.51573	2.09917	0.29075	10.0674	3.10558	35.3596	12.7092	56.9813	11.9338	128.758	22.5373	11541.3	0.965683	270.877	2.10377	0.159877	99.2711
C24-42	300.604	407.648	7.46911	1969.71	10.3217	12.4747	43.5605	4.56673	27.9109	16.3571	2.00541	57.5727	16.594	184.056	66.2562	286.982	57.4747	547.769	92.0166	12050.2	4.14901	1397.02	2.55039	0.178656	1.41356
C24-43	248.258	444.815	9.74647	2231.71	1.4767	0.0585098	2.32583	0.17424	2.22851	5.20988	0.30906	35.3701	13.6199	177.931	69.0541	325.475	66.4376	672.433	113.413	12436.5	0.689404	444.044	0.660355	0.0516918	3.65249
C24-44	297.274	493.947	15.9912	4129.52	7.01512	0.520011	24.8261	1.34794	13.802	21.1	2.94537	105.275	34.2982	401.468	140.629	609.495	119.983	1156.45	190.718	8848.3	2.6309	1701.11	1.47098	0.156206	4.95216
C24-45	820.181	683.149	13.6282	701.36	1.35051	0.757666	7.46802	1.1033	6.77092	6.30783	2.78743	18.0693	5.78462	63.5495	20.4835	96.6672	22.7436	272.65	48.8782	13659.3	1.28629	952.566	3.49373	0.744203	1.64783
C24-48	2264.82	345.924	11.463	2149.91	3.61544	0.127446	12.9577	0.42395	6.55731	10.2861	1.03222	49.7912	16.0985	191.059	69.3522	307.888	60.5854	599.235	96.8876	9512.31	1.66081	335.058	0.559143	0.114996	8.46845
C24-49	262.726	392.669	11.3617	1941.06	2.87172	0.359877	6.88581	0.619978	4.98235	7.84322	1.14265	37.1858	13.433	167.95	62.5656	288.964	59.7206	580.908	96.5641	12406.2	1.62555	977.255	1.68229	0.169677	2.79725
C24-50	238.59	436.852	13.7791	2152.9	1.44568	0.358452	2.8709	0.195182	2.00237	4.78609	0.131348	34.3813	12.8254	168.675	66.4171	315.617	64.5256	657.777	111.006	12057.8	0.766247	393.875	0.598797	0.0228073	2.63023
C24-51	308.642	468.008	25.3128	2452.75	1.22548	0.325281	2.71681	0.335139	3.40059	5.31014	0.553405	37.816	15.6376	207.562	76.3113	359.973	70.7769	716.505	121.474	11309.7	0.564371	442.997	0.618274	0.0872456	1.81183
C24-54	242.656	470.331	13.3898	1913.58	4.26147	1.39711	29.1945	2.32847	17.6362	19.2945	5.17997	59.0435	16.998	175	56.4805	256.06	55.6013	584.174	106.457	11421.9	2.1872	1651.99	2.82791	0.432049	3.13784
C24-55	532.259	355.068	15.5833	664.122	1.66049	0.755238	25.703	0.917763	5.83504	6.05636	1.94536	22.1733	7.02405	70.8006	19.7006	80.5102	16.5693	166.988	27.1901	11366.1	0.661928	341.575	2.0455	0.45484	6.53808
C24-59	1007.1	438.491	8.27936	1462.8	1.35894	0.16595	4.4371	0.358698	2.85439	5.55574	0.981599	33.7914	12.9111	144.542	44.745	174.13	31.2769	292.097	44.9232	13528.9	0.696953	641.62	2.1966	0.168612	3.23959
C24-60	474.404	484.006	26.7005	8864.76	20.6743	0.92248	100.075	2.47496	30.5815	50.6692	9.89203	239.868	76.1593	858.137	291.091	1220.77	229.344	2183.73	341.811	9078.74	3.56929	1033.87	0.473443	0.227644	10.9216
B14-13	32.4168	298.667	2.41613	1228.65	8.07125	0.0326634	42.0805	0.0612397	0.991386	2.90327	1.91649	21.1009	7.29564	87.4426	35.2582	167.795	39.9219	396.601	80.9102	12247.4	1.6751	1738.7	4.384	0.543216	175.754
B14-14	30.7525	296.26	3.00772	1441.37	6.52364	0.100382	63.7482	0.111393	2.15866	5.8332	2.84972	31.6066	10.2111	117.437	43.509	195.589	44.3368	424.588	83.5341	11616.2	1.22259	1578.6	3.71796	0.511993	130.522
B14-16	30.9302	292.238	4.40565	1326.38	7.18429	0.115705	42.3185	0.0839359	1.28694	3.27482	2.18929	23.4774	8.14438	98.2132	38.411	179.764	41.7588	407.733	81.4637	12068	1.30548	1477.12	3.62277	0.55653	100.818
B14-2	88.5846	468.303	4.4108	2798.45	22.1811	1.15876	39.8032	0.467704	3.52419	6.31749	1.51277	44.0967	17.6386	227.058	93.5853	427.879	95.8502	898.33	178.166	11221.5	4.5765	861.4	0.958891	0.203869	13.2561
B14-8	88.066	433.039	5.63679	2754.82	7.88119	19.5559	96.6383	6.80851	34.882	16.0036	3.00225	62.1574	20.396	243.91	92.9052	408.171	87.2903	800.233	158.763	9845.39	2.18074	612.391	0.765266	0.254321	2.04829
B14-9	80.9942	440.952	4.31264	2361.99	7.91211	0.485104	38.4601	0.295498	4.14751	7.86394	1.72324	49.7061	17.4441	208.338	79.5431	352.895	77.1401	719.083	141.88	10100.7	2.01013	718.685	0.999446	0.202614	24.3703
B14-5	118.853	411.471	1.88116	2250.26	7.61835	3.70649	30.634	1.37188	7.92074	5.85978	0.275379	35.1247	13.7812	185.618	77.8052	362.159	81.1558	761.101	155.325	11449.2	2.79352	520.679	0.684113	0.0453863	3.32816
B14-7	110.466	269.999	6.02196	1885.27	4.79588	0.0157409	36.8312	0.133516	2.93305	6.53614	0.376447	35.8858	12.7149	159.203	63.7376	299.503	69.2568	666.053	134.297	10880.8	1.24227	330.169	0.49571	0.0597246	81.7766
B14-12	107.334	263.144	10.2055	4533.78	3.21771	0.0570943	31.6309	0.576623	9.90346	18.8855	1.93275	107.097	35.5654	409.145	154.962	693.229	152.711	1392.97	277.705	9130.64	0.806179	317.351	0.227824	0.103394	16.3802
B14-3	250.393	299.81	3.39637	1245.89	4.00645	0.0289182	12.1289	0.083057	1.74078	4.12381	0.337576	25.8733	9.27255	113.886	44.7167	195.354	40.5269	354.247	67.9604	10754.5	1.71083	520.209	1.46849	0.0761532	39.7839
B14-10	447.117	262.24	1.58605	260.729	1.39593	0.0674713	12.4483	0.148395	0.944995	1.04704	0.391538	3.99153	1.52828	19.3435	8.0683	41.5175	10.6587	115.081	26.7582	13177.8	0.825274	289.4	2.51476	0.514004	22.0283
B14-11	429.3	391.259	5.50143	1555.37	2.48635	0.0115191	6.03081	0.0884386	1.81164	4.17141	0.348236	27.6798	10.7308	136.259	53.3917	240.098	52.7387	485.679	96.0997	11783.8	1.21925	328.503	0.676378	0.0741431	20.1203
B14-4	642.735	311.908	1.16089	372.314	3.26254	0.00153558	8.85446	0.00544013	0.11279	0.406711	0.162442	3.06568	1.53075	24.6714	12.2612	68.2774	18.2666	201.426	49.1848	12189.2	2.41326	507.505	2.51957	0.318691	453.945
B14-1	2476.84	299.605	77.9874	1247.55	3.87401	0.0434879	12.1381	0.114222	1.32766	3.07948	0.536504	19.814	7.59906	103.726	43.5995	204.027	45.3138	420.192	85.762	9762.47	1.44357	135.18	0.321711	0.158737	28.6231
B14-6	2486.73	280.828	5.22681	592.834	2.29356	0.020717	21.6689	0.0609669	1.17769	2.53555	0.379954	13.5282	4.42103	51.5884	20.1183	92.0037	20.4914	195.301	39.6667	9970.27	0.988537	237.382	1.21547	0.158998	97.1152
B17-3	33.142	274.773	1.99545	1128.79	5.94797	0.00741759	33.1084	0.0329594	0.644196	3.32705	2.00684	22.1595	7.47785	88.5405	33.8445	156.519	36.1075	345.497	70.383	11702.8	1.25978	1512.07	4.37651	0.534051	286.056
B17-4	33.3178	322.411	3.83967	1721.52	3.85454	0.012203	30.8729	0.144165	2.47478	5.65013	3.27482	31.0375	10.8379	128.849	50.9996	239.811	54.3794	521.236	105.625	10682.1	0.650556	980.447	1.881	0.600782	64.3027
B17-5	32.2251	290.271	3.79699	1319.81	5.99577	0.455736	47.3752	0.217082	1.6052	3.03546	1.94141	21.0633	7.54943	91.7593	36.3851	177.648	41.9657	429.371	90.4376	11872.7	1.02172	1486.64	3.46236	0.547218	36.7919
B17-7	31.1951	314.417	3.677	1526.92	3.92771	0.0807191	48.3209	0.223275	3.91416	9.06368	4.59037	44.9775	13.4972	141.427	48.8723	204.259	42.6443	385.385	74.4709	10978.9	0.779281	1049.59	2.72348	0.569162	58.6846
B17-15	34.4381	359.757	7.15931	2312.56	0.937436	0.720807	13.8931	0.231226	2.53656	4.79364	1.22925	34.1163	13.096	173.382	73.8077	361.808	83.8333	828.826	183.328	9856.03	0.331646	215.721	0.260273	0.214789	8.29212
B17-17	30.4209	289.383	2.37432	1267.18	7.08857	0.128061	42.0168	0.0886939	1.32935	3.37157	1.96601	21.5776	7.63239	92.5098	36.5869	174.318	40.6262	399.616	83.1095	12160.1	1.29631	1516.43	3.79472	0.533651	93.1569
B17-14	38.0911	373.597	6.63488	1957.32	0.910558	0.0633045	12.6488	0.0709961	0.995219	3.34386	0.783608	23.8926	9.89343	137.793	61.1521	310.699	74.8437	755.363	167.4	9628.21	0.328517	215.967	0.285912	0.195632	40.7477
B17-1	112.042	255.916	6.81322	4756.87	3.54016	0.0281654	35.6704	0.552125	8.6855	21.8185	1.70422	115.853	37.5042	437.374	163.485	730.113	160.032	1491.41	293.063	9655.63	0.856254	393.135	0.2636	0.083195	19.6554
B17-2	119.177	268.163	3.64167	719.163	2.65387	0.00266802	23.4208	0.0346247	0.695436	1.94335	0.804574	11.1255	4.0318	52.613	22.4707	114.644	29.2965	312.646	70.5871	10961.7	1.43123	284.037	0.908492	0.415077	203.708
B17-9	118.062	295.315	11.596	1254.82	2.983	6.82323	44.8891	1.18297	7.07991	5.32388	2.39479	23.7992	7.53748	91.673	37.8916	188.963	46.8874	508.969	120.406	10055.4	1.28967	831.282	1.63327	0.548304	3.55694
B17-10	99.927	319.873	5.11384	1142.33	2.91042	0.679538	20.1578	0.273416	2.41303	4.19261	1.17113	24.5734	8.0273	98.2256	38.2052	169.739	36.7543	346.264	70.3802	9521.8	0.814788	193.619	0.559165	0.274754	11.4659
B17-11	110.743	249.739	7.91221	2169.22	1.16275	0.0420293	15.1441	0.227934	5.09524	9.74492	0.836544	49.2195	16.0854	189.949	72.4989	329.931	73.6834	686.389	138.181	9720.61	0.384623	145.02	0.21128	0.0951386	19.2074
B17-12	101.834	273.804	14.7438	746.129	0.968417	0.0586303	17.5512	0.117779	1.92904	3.44553	0.395235	18.86	5.85546	67.1379	24.1201	104.516	21.882	194.646	38.306	12818.8	0.841537	934.063	4.79878	0.119241	38.5679
B17-13	112.897	278.799	12.0606	754.466	1.17067	0.327636	14.6016	0.295353	3.34273	3.31939	1.24037	13.3615	4.89127	60.1188	24.6835	122.94	30.8228	331.136	72.6546	10859.2	0.456284	393.775	1.18916	0.493242	10.6242
B17-6	256.677	309.868	8.47162	494.373	0.438323	0.00480227	2.01848	0.0397775	0.830485	1.9516	0.365882	12.5124	4.04579	47.7004	17.4555	73.9527	14.7544	127.089	24.2067	9839.45	0.215549	92.3648	0.726774	0.171321	15.0268
B17-8	395.695	431.693	5.37702	2749.79	5.02137	0.0159398	15.0122	0.154439	3.25257	8.71361	1.92976	58.8078	20.976	253.614	96.9659	421.354	87.1316	773.035	153.168	8246.83	1.66542	565.989	0.732165	0.193935	28.979
B18-1	113.571	243.782	7.15579	3604.55	2.37465	0.0255242	21.4531	0.385572	6.74923	12.7919	0.867766	82.1255	27.4123	322.843	122.364	554.549	121.757	1194	223.49	9461.36	0.755036	262.102	0.219515	0.061921	16.8272
B18-2	114.771	308.797	14.4468	3322.22	5.03182	0.0164082	48.6703	0.204668	4.01954	9.94837	0.885983	61.2404	21.791	275.101	110.326	517.564	115.945	1159.39	220.152	8525.41	0.964697	299.078	0.257961	0.0841563	71.5284
B18-7	116.062	247.316	4.1783	2147.77	6.22026	0.00498941	47.0528	0.0729021	1.71565	5.52759	0.198246	33.5468	12.6697	166.165	69.347	348.385	83.6034	878.565	171.108	12978.9	1.81007	382.085	0.434896	0.0342878	195.027
B18-8	127.423	244.317	5.7219	890.26	0.926924	0.00746986	10.4243	0.0536788	1.49484	3.32109	0.279647	18.0852	6.27917	74.8187	29.5192	141.677	33.1191	341.578	66.6443	10105.8	0.348153	86.4768	0.253168	0.0878936	57.105
B19-1-1	97.1613	440.249	5.46661	3373.44	17.5335	3.16531	47.3647	0.836534	5.02896	9.77253	2.43319	57.7497	22.5937	285.572	111.201	502.6	109.98	1004.87	199.812	10796.9	3.62351	1152.71	1.14712	0.243273	6.98452
B19-1-3	88.8243	454.384	5.7679	3159.35	28.3362	0.694814	67.6277	0.604867	7.17512	13.4955	3.47345	70.9385	24.076	283.035	106.299	465.716	99.9668	921.866	183.447	10064	3.32377	844.568	0.91615	0.276356	23.7673
B19-1-4	249.148	485.409	8.2004	1421.64	1.39248	0.00488831	1.79227	0.104649	2.21462	7.33475	0.441526	47.4862	15.3854	152.414	48.3782	186.799	36.9863	313.435	59.9096	10878.1	0.723807	418.097	1.33392	0.0545669	5.21934
B19-1-2	360.568	369.661	4.1089	1939.62	2.29531	0.0016433	9.49777	0.0374773	0.915889	2.98667	0.766949	22.3415	9.39779	136.777	62.1559	316.159	75.2054	750.197	164.969	9273.72	0.649904	147.627	0.196785	0.206229	77.3194
B20-2-2	35.6021	405.223	7.87754	2981.77	0.983348	0.00460621	15.0302	0.115804	2.44359	6.31924	1.60483	46.8213	18.0649	237.425	99.9841	469.515	105.148	992.568	205.58	9501.16	0.34023	201.044	0.202549	0.205612	39.6621
B20-2-7	37.0359	342.121	4.75354	2827.55	0.77261	0.63768	13.5233	0.331837	3.58693	7.88305	1.79756	48.5261	17.4337	223.931	92.3662	436.38	99.1534	956.915	205.916	9836.67	0.302663	216.509	0.226257	0.21548	7.14685
B20-2-6	109.094	327.867	9.97157	2670.22	14.6192	0.342195	156.658	0.461591	5.43739	11.2208	3.8624	60.2462	19.117	222.192	84.2582	383.428	87.3066	861.77	180.823	11089.9	3.97738	1748.82	2.02933	0.363393	81.2275
B20-2-4	255.345	298.523	2.5393	1639.86	2.69567	0.359494	11.8098	0.375418	4.22012	6.47214	0.941729	36.6574	12.5247	149.974	58.1028	251.536	51.8616	454.878	87.2587	10702.6	1.34823	556.699	1.22384	0.14715	7.05739
B20-2-1	394.772	294.143	9.8019	839.345	2.2666	1.3422	11.7815	0.49874	3.37065	3.89845	0.574311	18.2594	6.26351	73.3628	28.4102	132.534	30.044	287.22	60.0928	10444	1.12884	311.284	1.08378	0.173211	3.528
B6-41	107.889	154.792	88.1705	1773.37	4.95858	0.462036	24.5668	0.252556	2.97148	3.37934	0.478981	19.0732	7.57556	107.838	41.0315	229.434	46.0657	601.22	96.4103			807.74	1.3435	0.143746	17.4227
B6-42	112.363	152.439	10.6253	1346.44	3.36216	1.07159	23.7548	0.346245	2.84916	3.06651	0.328025	16.9498	6.4979	89.6252	33.6961	177.636	37.2579	466.208	77.2136			609.113	1.30652	0.110328	9.50633
B6-38	178.629	198.159	7.34925	1294.97	3.04259	0.0901601	9.80303	0.0564268	0.579327	1.82833	0.152016	14.4993	5.60918	83.9078	33.4207	178.507	38.0965	485.28	86.3614			585.637	1.2068	0.0635337	32.8781
B6-39	181.428	187.212	3.75082	1293.13	1.94792	0.0314392	7.41473	0.0510897	0.635761	2.18955	0.357329	13.4626	5.78475	81.3532	33.8146	180.411	38.2366	490.156	84.2171			469.848	0.958568	0.154364	36.1421
B6-37	250.936	161.382	5.91557	405.011	1.63106	n/a	6.06789	0.0204102	n/a	0.652821	0.327223	5.08074	1.71928	25.0136	9.65397	54.6858	12.9504	185.16	33.9874			544.81	2.94237	0.389214	n/a
B6-40	1987.04	191.245	19.6342	425.867	0.662952	0.0238755	6.04438	0.0764984	0.836166	2.1176	0.650211	10.901	3.53751	35.3878	10.5549	46.8638	9.58519	127.132	23.2478			420.074	3.30424	0.335211	21.8026
B8-54-1	43.0343	279.731	12.1357	2654.09	1.03879	0.534615	12.943	0.296274	1.94141	3.38649	0.961745	26.5764	10.8563	162.636	69.8402	374.568	79.4371	967.68	169.151			235.748	0.243621	0.218961	7.87014
B8-56	107.381	199.801	n/a	910.619	1.22701	0.533293	10.2584	0.24127	1.72869	1.5661	0.446578	11.453	3.78147	51.5032	21.8685	125.572	27.8408	384.308	71.659			255.259	0.664205	0.233435	6.99899
B8-55-1	115.073	190.582	2.50129	1255.45	1.18128	0.00649316	11.9768	0.115894	1.299	3.7881	0.761125	20.7627	6.3915	81.1608	32.2757	167.163	36.2933	460.906	87.4324			306.179	0.664297	0.20864	31.3788
B8-55-2	103.182	190.11	25.3604	1483.22	2.71197	0.225537	14.742	0.379345	2.45195	3.96398	1.26555	22.3684	7.21278	100.048	37.3893	195.935	43.229	552.652	95.6629			375.857	0.680097	0.32384	9.74297
B8-55	112.972	198.903	12.8491	1050.85	2.40185	0.00662172	15.0882	0.0612336	0.674889	1.58705	0.54342	10.8366	4.64742	65.4201	26.3355	147.241	32.0599	419.745	77.5982			394.884	0.94077	0.296941	73.3195
B8-50	234.587	187.644	n/a	1347.87	0.587506	0.198397	10.3439	0.0878857	2.58084	1.25781	0.409851	19.6592	6.33654	80.5662	35.5901	197.052	42.9665	544.572	99.7363			125.823	0.23105	0.136041	19.1823
B8-49	269.136	239.41	18.993	2974.47	2.11356	0.193761	12.8733	0.257859	2.99865	5.88064	1.84367	36.8339	15.1872	202.642	78.2703	402.269	79.385	940.002	155.103			289.183	0.307641	0.292062	11.9115
B8-48	256.026	152.769	4.60831	1248.58	0.306537	0.551152	7.79974	0.0917647	0.927664	4.0321	0.690185	20.0583	7.41552	90.4465	33.0781	161.486	31.9411	370.405	60.9711			60.684	0.163831	0.191991	7.74404
B8-44	244.746	160.574	5.31398	1243.86	1.08162	n/a	12.72	0.0852679	1.21758	2.66002	0.584089	13.6077	4.92217	70.7719	30.9969	162.531	37.6869	514.53	92.6695			404.992	0.787111	0.240912	n/a
B8-53	310.92	144.779	13.0302	620.268	0.427014	0.0131562	2.87285	0.0260493	0.553428	0.870771	0.342547	8.50106	2.86	41.1513	16.7157	86.6221	19.4946	249.686	47.8662			74.575	0.298675	0.251003	28.4744
B8-52	288.282	180.518	7.4361	1295.3	1.30963	0.132868	5.45887	0.0754926	2.11776	2.25161	1.29385	15.9798	5.58729	81.5778	32.8935	186.701	42.3324	565.833	104.879			140.226	0.247822	0.48245	13.1629
B8-51	312.416	132.634	12.8622	5570.33	7.76265	1.45049	47.4018	0.843017	9.2514	14.4384	1.10121	90.8868	31.1396	409.182	153.006	730.121	138.694	1504.98	239.285			522.312	0.347057	0.0707602	10.3313
B8-45	291.022	238.964	3.55594	1763.36	1.23791	0.303241	18.7579	0.244793	2.40255	5.15254	1.66155	28.1237	9.34966	116.405	43.9451	223.951	48.1545	611.295	112.895			217.074	0.355105	0.335978	15.8963
B8-54-2	548.254	100.167	105.144	2835.02	45.1057	0.271144	26.7406	0.277436	2.28661	6.5744	1.32887	41.3817	16.8487	227.806	82.0409	389.544	70.7994	754.297	112.406			240.004	0.318182	0.187537	21.5004
B8-54	736.831	111.578	4.38889	4286.26	32.7936	n/a	47.2918	0.0939577	4.14074	9.53584	1.63572	67.5971	25.0915	342.443	125.529	578.965	102.342	1040.15	150.229			277.095	0.266399	0.144158	n/a
B8-43	834.193	357.878	n/a	1652.79	1.42593	n/a	2.60352	0.459515	3.52966	5.70383	1.75823	44.4839	14.999	159.713	47.5675	184.892	33.3059	335.631	48.9055			1169.48	3.48443	0.238933	n/a
B8-46	1861.12	440.781	29.8237	5437.62	2.37146	0.873268	16.9573	2.49283	17.725	18.9383	6.5712	81.6429	31.51	420.661	153.69	717.573	141.313	1592.91	238.413			607.287	0.381243	0.434863	1.85183
B12-64	134.423	172.158	5.7186	1329.27	3.73849	0.175589	27.6862	0.195721	2.8249	5.12219	1.35724	25.2267	8.12706	99.1277	35.838	175.566	33.902	405.423	65.9464			273.989	0.675809	0.299556	32.3007
B12-65	137.539	168.428	11.7299	820.913	2.00755	0.305872	19.9751	0.168066	1.51001	2.31921	0.574578	12.5061	4.38421	56.0388	21.1476	108.511	22.743	277.654	48.6259			169.876	0.611827	0.260646	21.3347
B12-67	142.229	193.725	4.55564	1399.61	3.03973	n/a	14.6254	0.105394	1.78034	3.70815	0.784122	22.6146	8.23328	100.315	38.49	187.362	37.4281	439.006	73.5448			339.183	0.772614	0.201356	n/a
B12-66	136.805	193.248	6.72113	1818.94	2.98265	4.93715	26.8129	1.82499	11.2961	7.44947	1.16849	31.2526	11.3253	136.466	49.7431	236.805	46.0018	517.741	84.01			351.486	0.678885	0.200691	2.18828
B12-60-1	284.546	225.255	8.55627	1583.02	2.33825	0.410972	6.49748	0.0723646	1.70113	4.30783	0.4454	22.1344	7.83901	108.084	41.8857	201.474	40.2784	494.369	80.0129			668.24	1.3517	0.113043	8.50776
B12-60	276.148	162.436	9.73482	628.003	0.507431	0.233322	5.41652	0.0963562	2.32444	1.86231	0.255285	10.4632	2.62974	41.991	16.1594	87.1437	19.0601	245.044	46.5666			88.7388	0.362133	0.139535	8.85602
B12-57-1	281.996	175.02	26.3753	1899.51	0.386743	0.125905	5.15123	0.285547	4.19622	8.58408	2.11429	37.2163	11.3792	141.092	50.9762	230.66	44.6322	487.877	76.0209			63.4522	0.130058	0.307355	4.75942
B12-57-2	278.169	171.971	24.1727	1930.21	0.561837	0.0182409	4.92029	0.197126	2.9012	5.97481	1.26977	33.1295	10.9691	139.676	52.2321	246.211	46.2742	520.78	81.5381			68.1277	0.130819	0.218636	7.47191
B12-57-3	291.242	171.63	22.4483	1826.48	0.559194	0.0964919	4.93828	0.171296	3.16079	6.39009	1.23598	32.6736	10.9059	133.415	49.785	232.652	43.8298	480.972	76.1514			61.6764	0.128233	0.212292	7.3015
B12-57	284.2	169.015	18.8355	2074.74	0.414806	0.0866695	5.20248	0.209818	4.04786	6.53322	1.08188	31.0216	10.8092	144.007	55.9928	267.412	50.2708	555.435	90.6307			81.8828	0.147421	0.19264	6.60433
B12-61	329.707	156.196	39.1584	2191.28	0.663449	n/a	7.45667	0.185003	3.49522	5.75061	1.63086	32.8503	10.576	141.632	55.2685	291.583	61.3461	725.443	125.353			127.455	0.175693	0.284828	n/a
B12-63	1900	346.192	4453.63	1127.24	15.3496	0.398977	9.20665	0.256269	3.91265	3.38147	0.320386	16.889	6.39135	79.5201	28.4457	144.251	31.395	405.828	68.4725			584.966	1.44141	0.105938	6.8676
B12-62	2487.34	171.331	93.4946	877.75	2.60194	0.0995725	27.4609	0.124874	3.24658	4.64994	1.46968	20.9959	5.72035	66.2633	23.7636	104.389	21.4664	260.639	42.6752			194.242	0.745253	0.382304	51.7361
